# Supplementary material for: Novel Metabolites from the Marine-Derived Fungus Peniophora sp. SCSIO41203 Show Promising In Vitro Antitumor Activity as Methuosis Inducers in PC-3 Cells
Source: MDPI journal article supplement (doi:10.3390/md22050218), 2024-05-14
Supplement: s1 [file s1]

# **Novel metabolites from the marine-derived fungus *Peniophora* sp. SCSIO41203 shows promising in vitro antitumor activity as methuosis inducers in PC-3 cells**

**Bin Yang <sup>1,†</sup>, Surun Shao <sup>2,†</sup>, Mingyi Nie <sup>3</sup>, Qingqing Tie <sup>2</sup>, Xiaoyan Pang <sup>1</sup>, Xiuping Lin <sup>1</sup>, Xuefeng Zhou <sup>1</sup>, Yonghong Liu <sup>1,\*</sup>, Xueni Wang <sup>3,\*</sup> and Yunqiu Li <sup>2,\*</sup>**

<sup>1</sup> CAS Key Laboratory of Tropical Marine Bio-Resources and Ecology, Guangdong Key Laboratory of Marine Materia Medica, South China Sea Institute of Oceanology, Chinese Academy of Sciences, Guangzhou 510301, China; yangbin@scsio.ac.cn (B.Y.); xypang@scsio.ac.cn (X.P.); xiupinglin@scsio.ac.cn (X.L.); xfzhou@scsio.ac.cn (X.Z.)

<sup>2</sup> Pharmacy School, Guilin Medical University, Guilin 541004, China; shaosurun@163.com (S.S.); 13438454556@163.com (Q.T.)

<sup>3</sup> Guangxi Zhuang Yao Medicine Center of Engineering and Technology, Guangxi University of Chinese Medicine, Nanning 530200, China; niemingyineu@163.com

\* Correspondence: yonghongliu@scsio.ac.cn (Y.L.); wangxueni@gxtcmu.edu.cn (X.W.); leeyq88@126.com (Y.L.)

† These authors contributed equally to this work.

## Contents

|                                                                                                       |    |
|-------------------------------------------------------------------------------------------------------|----|
| <b>Figure S1.</b> $^1\text{H}$ NMR spectrum of <b>1</b> ( $\text{CD}_3\text{OD}$ , 700 MHz) .....     | 4  |
| <b>Figure S2.</b> $^{13}\text{C}$ NMR spectrum of <b>1</b> ( $\text{CD}_3\text{OD}$ , 175 MHz) .....  | 4  |
| <b>Figure S3.</b> HSQC spectrum of <b>1</b> ( $\text{CD}_3\text{OD}$ ) .....                          | 5  |
| <b>Figure S4.</b> HMBC spectrum of <b>1</b> ( $\text{CD}_3\text{OD}$ ) .....                          | 5  |
| <b>Figure S5.</b> NOESY spectrum of <b>1</b> ( $\text{CD}_3\text{OD}$ ) .....                         | 6  |
| <b>Figure S6.</b> HRESIMS spectrum of <b>1</b> .....                                                  | 6  |
| <b>Figure S7.</b> IR spectrum of <b>1</b> .....                                                       | 7  |
| <b>Figure S8.</b> UV spectrum of <b>1</b> .....                                                       | 8  |
| <b>Figure S9.</b> $^1\text{H}$ NMR spectrum of <b>2</b> ( $\text{CD}_3\text{OD}$ , 700 MHz) .....     | 9  |
| <b>Figure S10.</b> $^{13}\text{C}$ NMR spectrum of <b>2</b> ( $\text{CD}_3\text{OD}$ , 175 MHz) ..... | 9  |
| <b>Figure S11.</b> HSQC spectrum of <b>2</b> ( $\text{CD}_3\text{OD}$ ) .....                         | 10 |
| <b>Figure S12.</b> HMBC spectrum of <b>2</b> ( $\text{CD}_3\text{OD}$ ) .....                         | 10 |
| <b>Figure S13.</b> NOESY spectrum of <b>2</b> ( $\text{CD}_3\text{OD}$ ) .....                        | 11 |
| <b>Figure S14.</b> HRESIMS spectrum of <b>2</b> .....                                                 | 11 |
| <b>Figure S15.</b> IR spectrum of <b>2</b> .....                                                      | 12 |
| <b>Figure S16.</b> UV spectrum of <b>2</b> .....                                                      | 13 |
| <b>Figure S17.</b> $^1\text{H}$ NMR spectrum of <b>4</b> ( $\text{DMSO}-d_6$ , 500 MHz) .....         | 14 |
| <b>Figure S18.</b> $^{13}\text{C}$ NMR spectrum of <b>4</b> ( $\text{DMSO}-d_6$ , 125 MHz) .....      | 14 |
| <b>Figure S19.</b> HSQC spectrum of <b>4</b> ( $\text{DMSO}-d_6$ ) .....                              | 15 |
| <b>Figure S20.</b> HMBC spectrum of <b>4</b> ( $\text{DMSO}-d_6$ ) .....                              | 15 |
| <b>Figure S21.</b> NOESY spectrum of <b>4</b> ( $\text{DMSO}-d_6$ ) .....                             | 16 |
| <b>Figure S22.</b> HRESIMS spectrum of <b>4</b> .....                                                 | 16 |
| <b>Figure S23.</b> IR spectrum of <b>4</b> .....                                                      | 17 |
| <b>Figure S24.</b> UV spectrum of <b>4</b> .....                                                      | 18 |
| <b>Figure S25.</b> $^1\text{H}$ NMR spectrum of <b>5</b> ( $\text{DMSO}-d_6$ , 700 MHz) .....         | 19 |
| <b>Figure S26.</b> $^{13}\text{C}$ NMR spectrum of <b>5</b> ( $\text{DMSO}-d_6$ , 175 MHz) .....      | 19 |
| <b>Figure S27.</b> HSQC spectrum of <b>5</b> ( $\text{DMSO}-d_6$ ) .....                              | 20 |
| <b>Figure S28.</b> HMBC spectrum of <b>5</b> ( $\text{DMSO}-d_6$ ) .....                              | 20 |
| <b>Figure S29.</b> NOESY spectrum of <b>5</b> ( $\text{CD}_3\text{OD}$ ) .....                        | 21 |
| <b>Figure S30.</b> HRESIMS spectrum of <b>5</b> .....                                                 | 21 |

|                                                                                                                                                                                                                                 |    |
|---------------------------------------------------------------------------------------------------------------------------------------------------------------------------------------------------------------------------------|----|
| <b>Figure S31.</b> IR spectrum of <b>5</b> .....                                                                                                                                                                                | 22 |
| <b>Figure S32.</b> UV spectrum of <b>5</b> .....                                                                                                                                                                                | 23 |
| <b>Figure S33.</b> $^1\text{H}$ NMR spectrum of <b>7</b> (DMSO- $d_6$ , 700 MHz).....                                                                                                                                           | 24 |
| <b>Figure S34.</b> $^{13}\text{C}$ NMR spectrum of <b>7</b> (DMSO- $d_6$ , 175 MHz) .....                                                                                                                                       | 24 |
| <b>Figure S35.</b> HSQC spectrum of <b>7</b> (DMSO- $d_6$ ) .....                                                                                                                                                               | 25 |
| <b>Figure S36.</b> HMBC spectrum of <b>7</b> (DMSO- $d_6$ ) .....                                                                                                                                                               | 25 |
| <b>Figure S37.</b> HRESIMS spectrum of <b>7</b> .....                                                                                                                                                                           | 26 |
| <b>Figure S38.</b> IR spectrum of <b>7</b> .....                                                                                                                                                                                | 26 |
| <b>Figure S39.</b> UV spectrum of <b>7</b> .....                                                                                                                                                                                | 27 |
| <b>Figure S40.</b> $^1\text{H}$ NMR spectrum of <b>12</b> (DMSO- $d_6$ , 500 MHz).....                                                                                                                                          | 28 |
| <b>Figure S41.</b> $^{13}\text{C}$ NMR spectrum of <b>12</b> (DMSO- $d_6$ , 125 MHz) .....                                                                                                                                      | 28 |
| <b>Figure S42.</b> HSQC spectrum of <b>12</b> (DMSO- $d_6$ ) .....                                                                                                                                                              | 29 |
| <b>Figure S43.</b> HMBC spectrum of <b>12</b> (DMSO- $d_6$ ) .....                                                                                                                                                              | 29 |
| <b>Figure S44.</b> HRESIMS spectrum of <b>12</b> .....                                                                                                                                                                          | 30 |
| <b>Figure S45.</b> IR spectrum of <b>12</b> .....                                                                                                                                                                               | 30 |
| <b>Figure S46.</b> UV spectrum of <b>12</b> .....                                                                                                                                                                               | 31 |
| <b>Figure S47.</b> The NMR calculations of two candidate structures ( <b>5a</b> and <b>5b</b> ) .....                                                                                                                           | 32 |
| <b>Figure S48.</b> The optimized conformers and equilibrium populations of <b>5a</b> and <b>5b</b> ....                                                                                                                         | 34 |
| <b>Table S1.</b> Energies of <b>5</b> at MMFF94 force field.....                                                                                                                                                                | 35 |
| <b>Table S2.</b> Energies of <b>5</b> at B3LYP/6–31+G(d, p) level in methanol .....                                                                                                                                             | 36 |
| <b>Table S3.</b> DP4+ analysis of calculated $^1\text{H}$ & $^{13}\text{C}$ NMR data of <b>5a</b> and <b>5b</b><br>(experimental for <b>5</b> , isomers <b>1</b> and <b>2</b> for <b>5a</b> and <b>5b</b> , respectively) ..... | 37 |

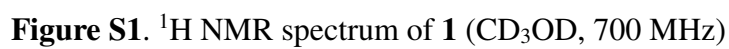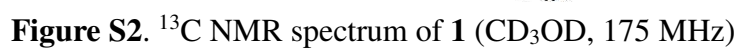

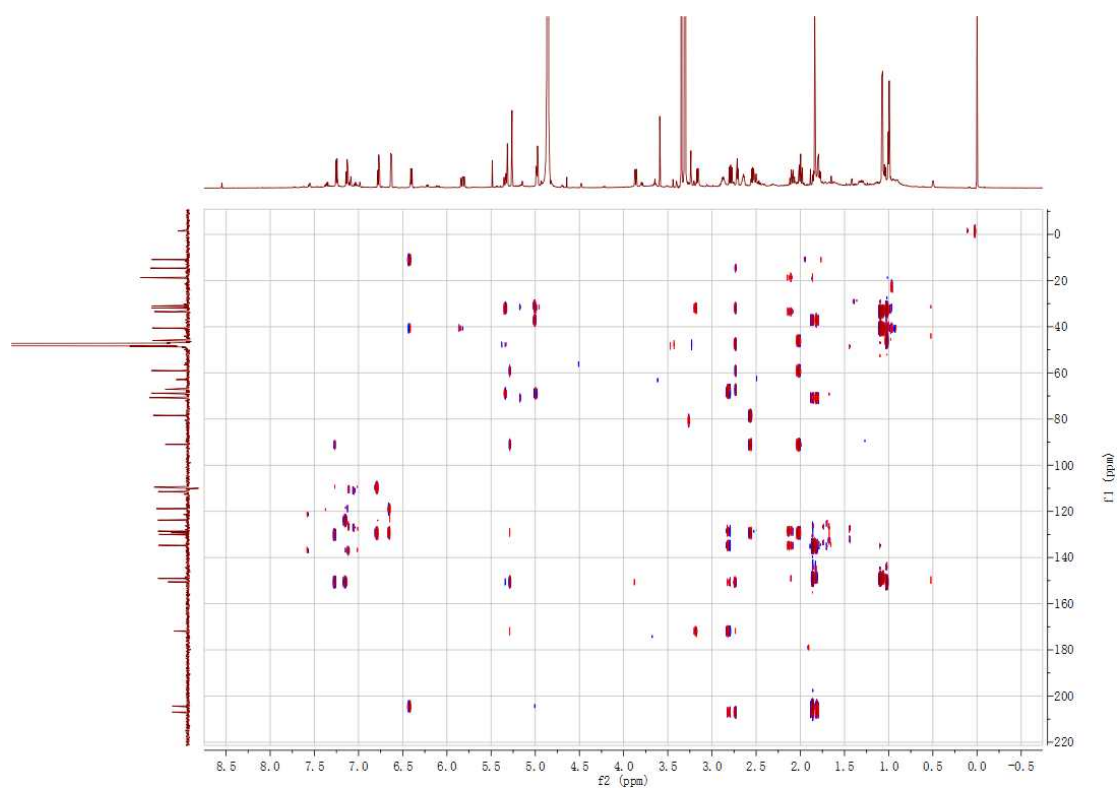

**Figure S3.** HSQC spectrum of **1** ( $\text{CD}_3\text{OD}$ )

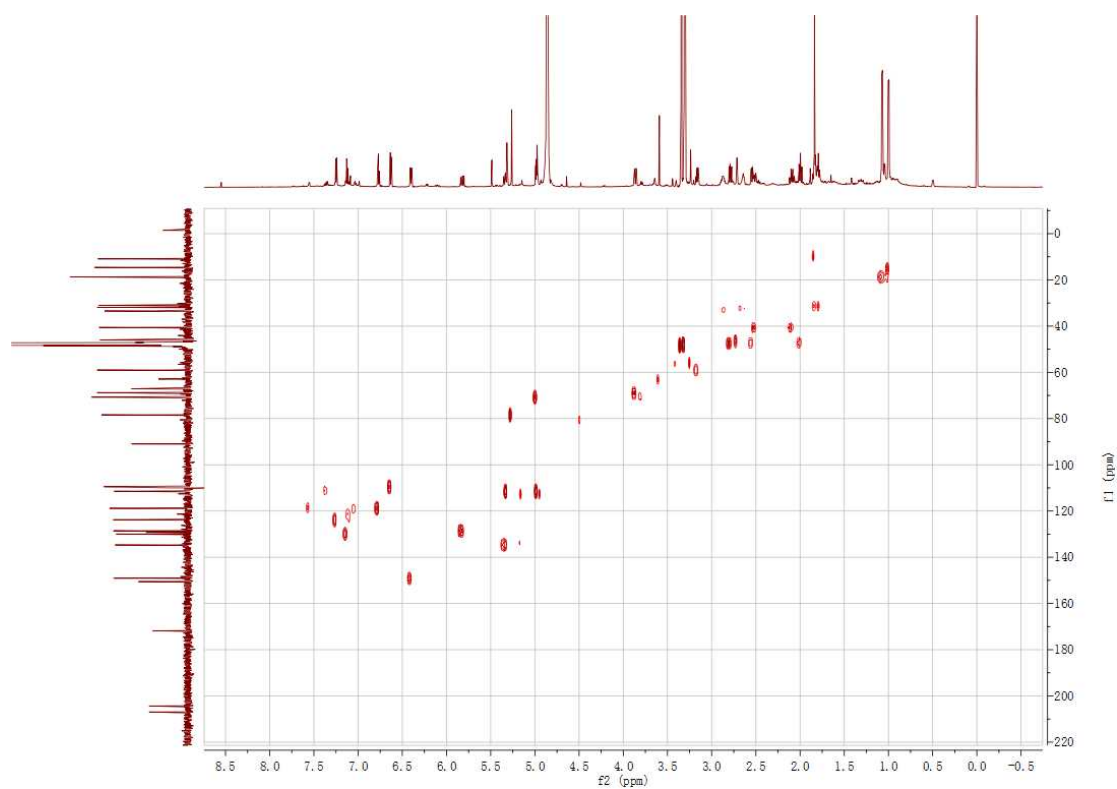

**Figure S4.** HMBC spectrum of **1** ( $\text{CD}_3\text{OD}$ )

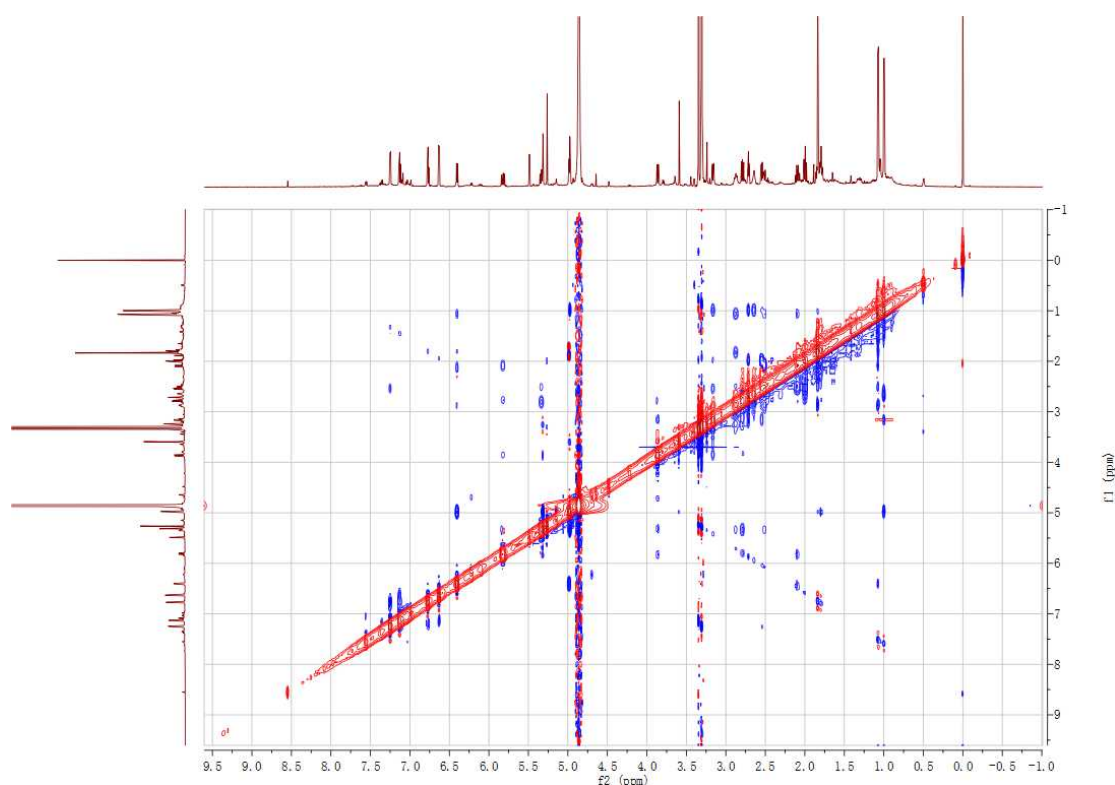

**Figure S5.** NOESY spectrum of **1** (CD<sub>3</sub>OD)

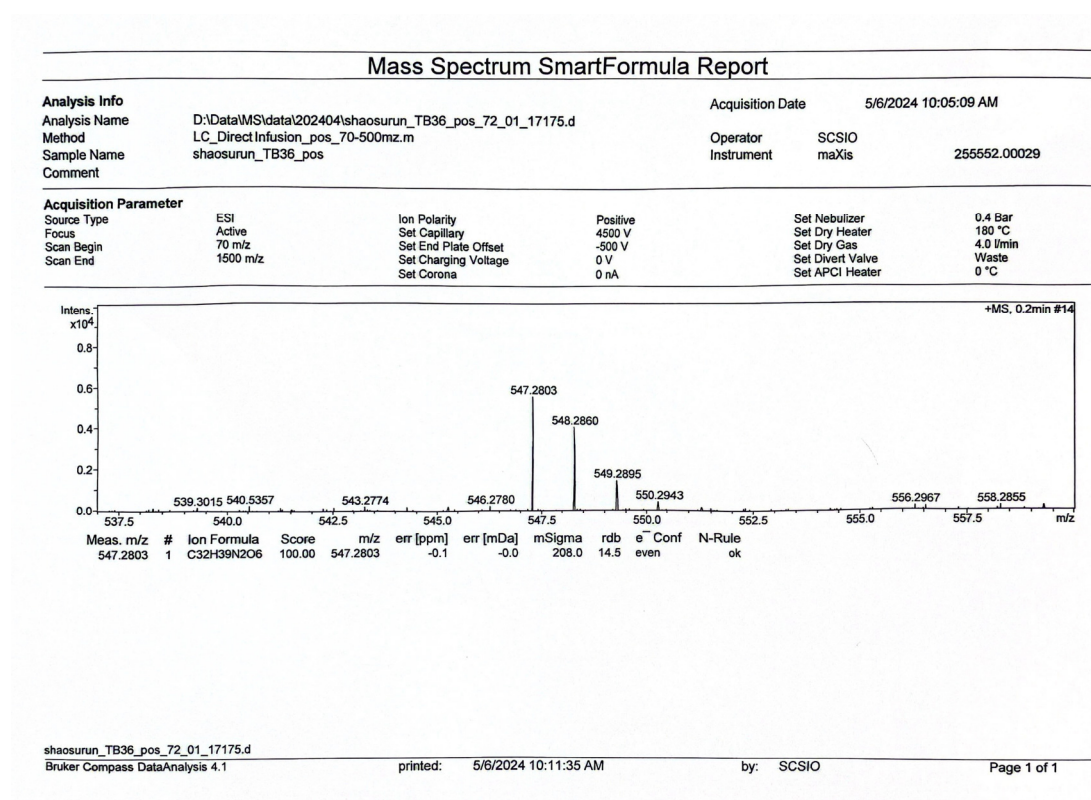

**Figure S6.** HRESIMS spectrum of **1**

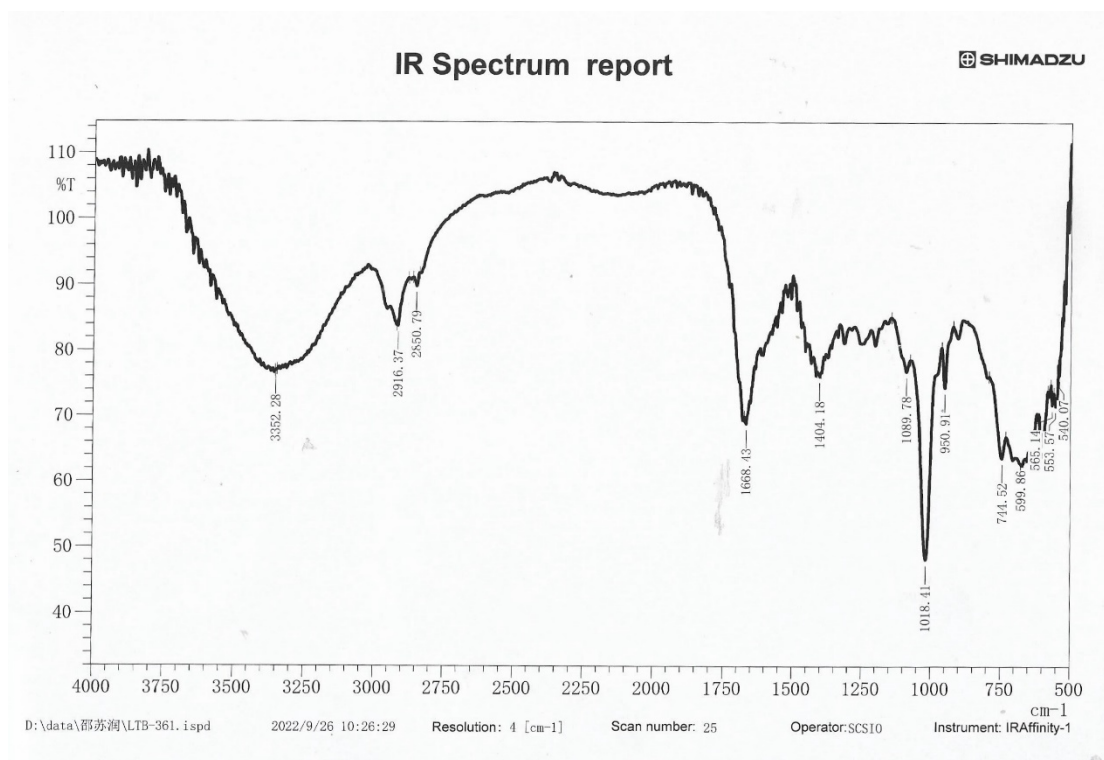

**Figure S7.** IR spectrum of **1**

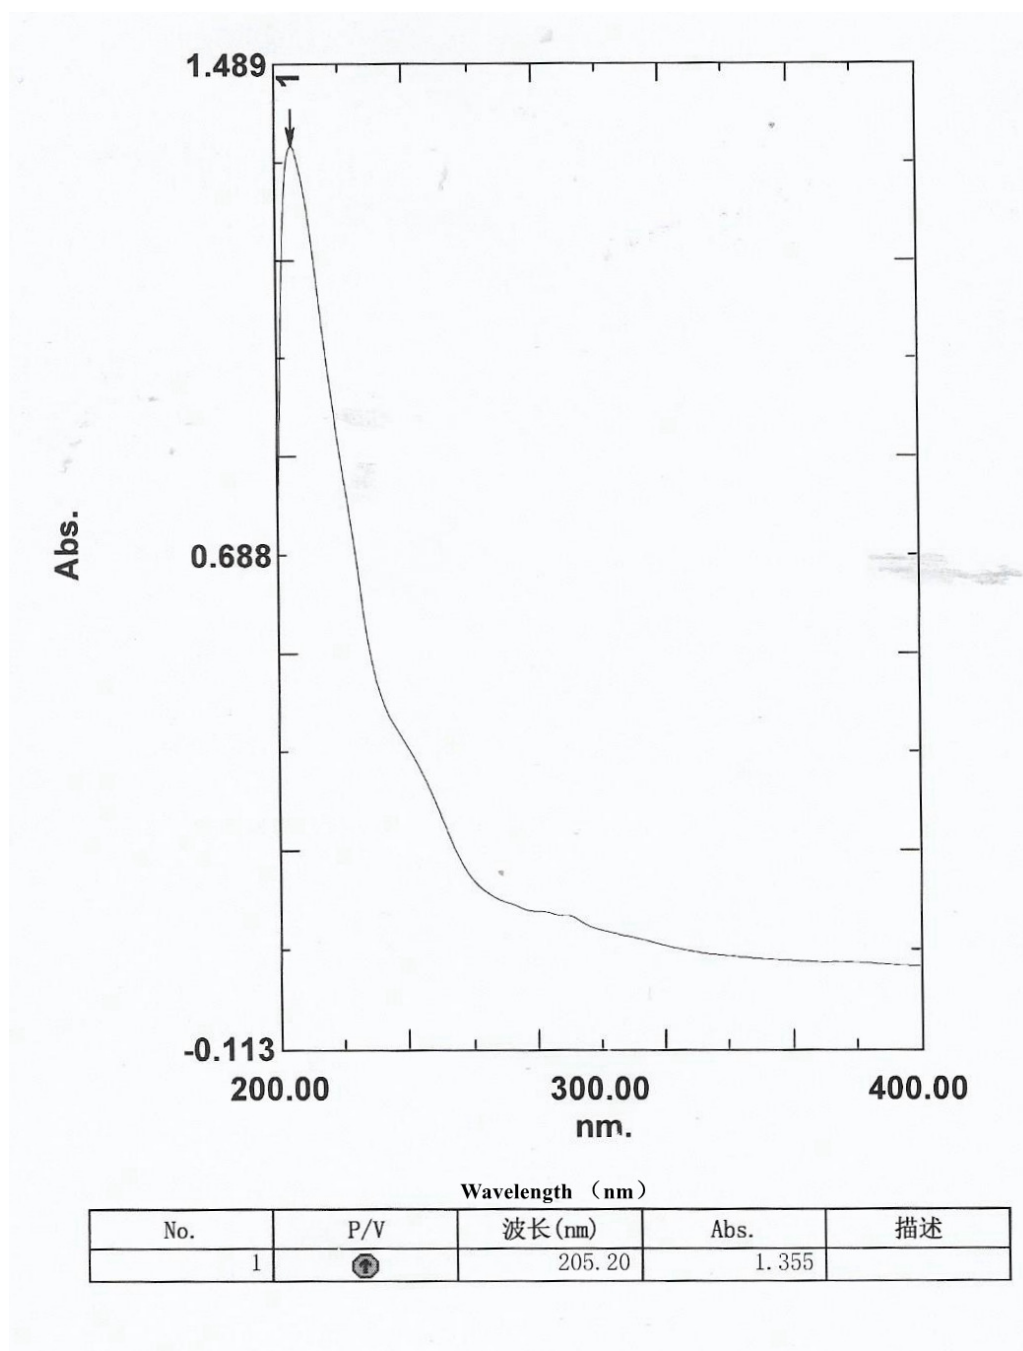

**Figure S8.** UV spectrum of **1**



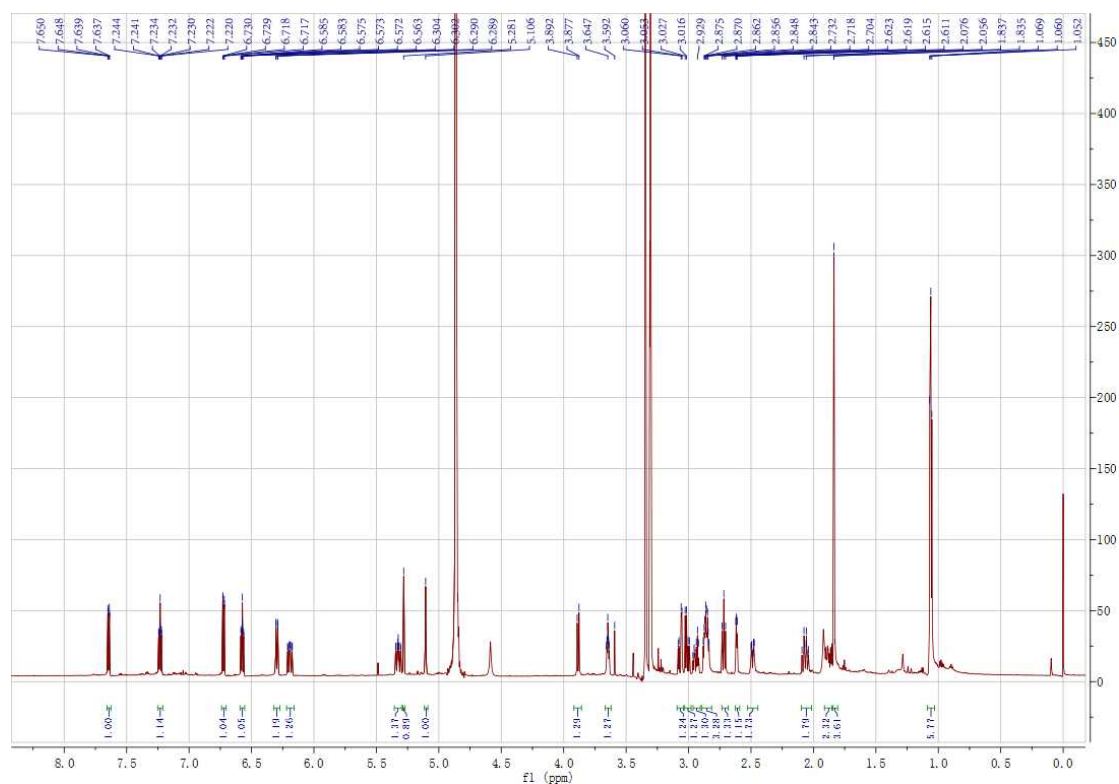

**Figure S9.** <sup>1</sup>H NMR spectrum of **2** (CD<sub>3</sub>OD, 700 MHz)

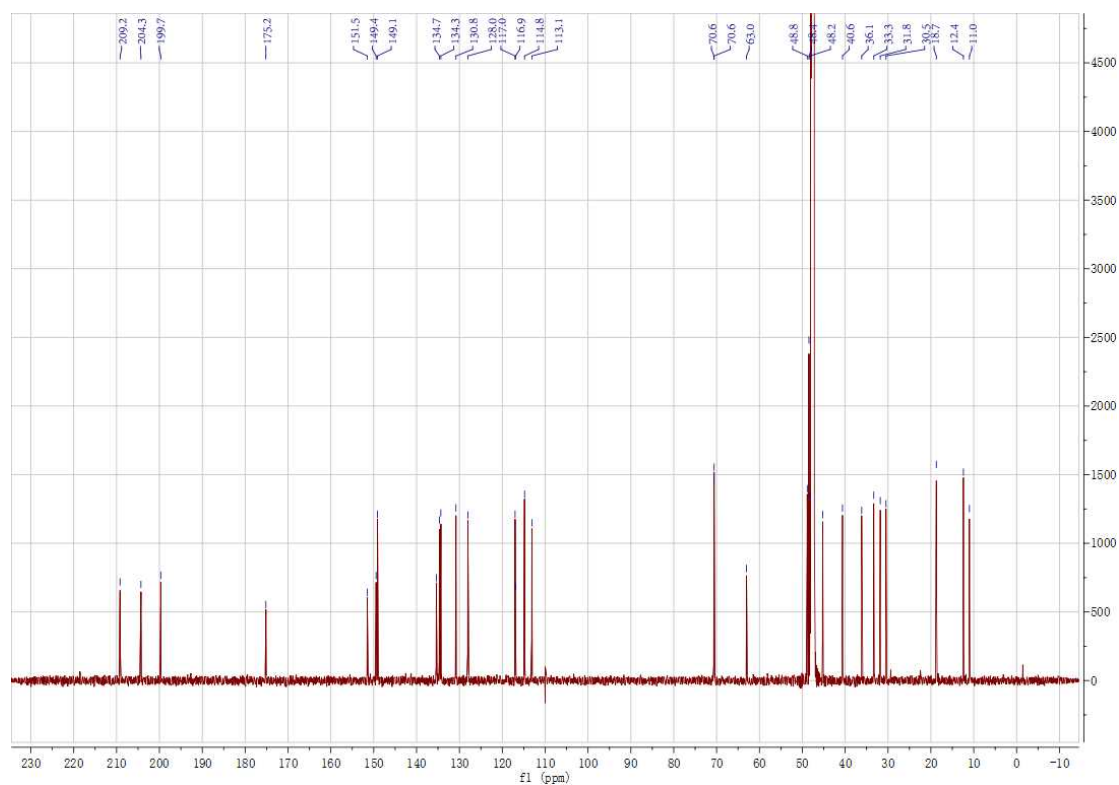

**Figure S10.** <sup>13</sup>C NMR spectrum of **2** (CD<sub>3</sub>OD, 175 MHz)

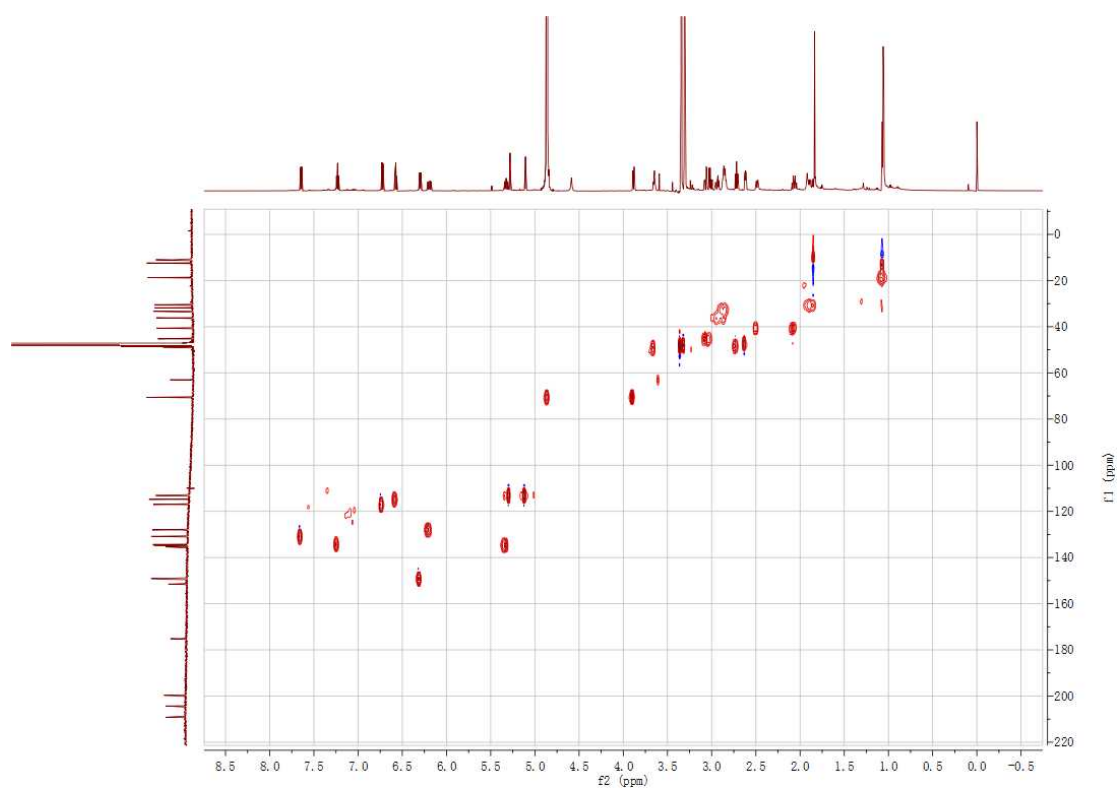

**Figure S11.** HSQC spectrum of **2** (CD<sub>3</sub>OD)

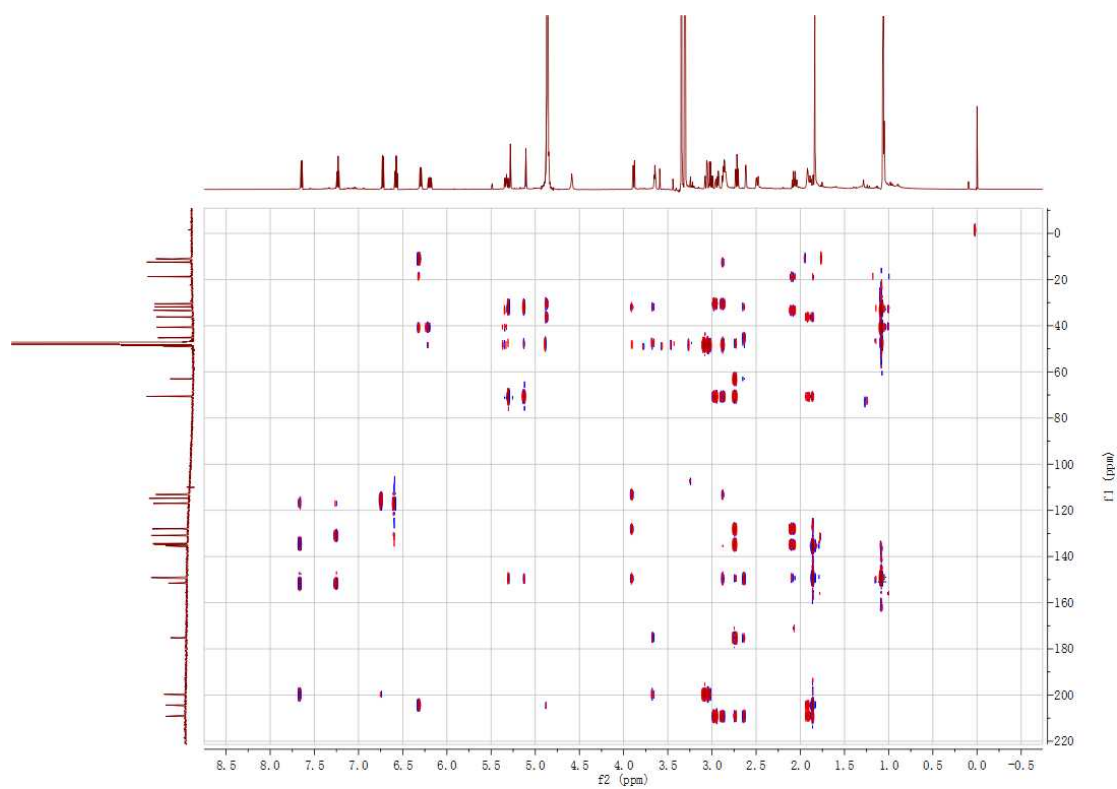

**Figure S12.** HMBC spectrum of **2** (CD<sub>3</sub>OD)

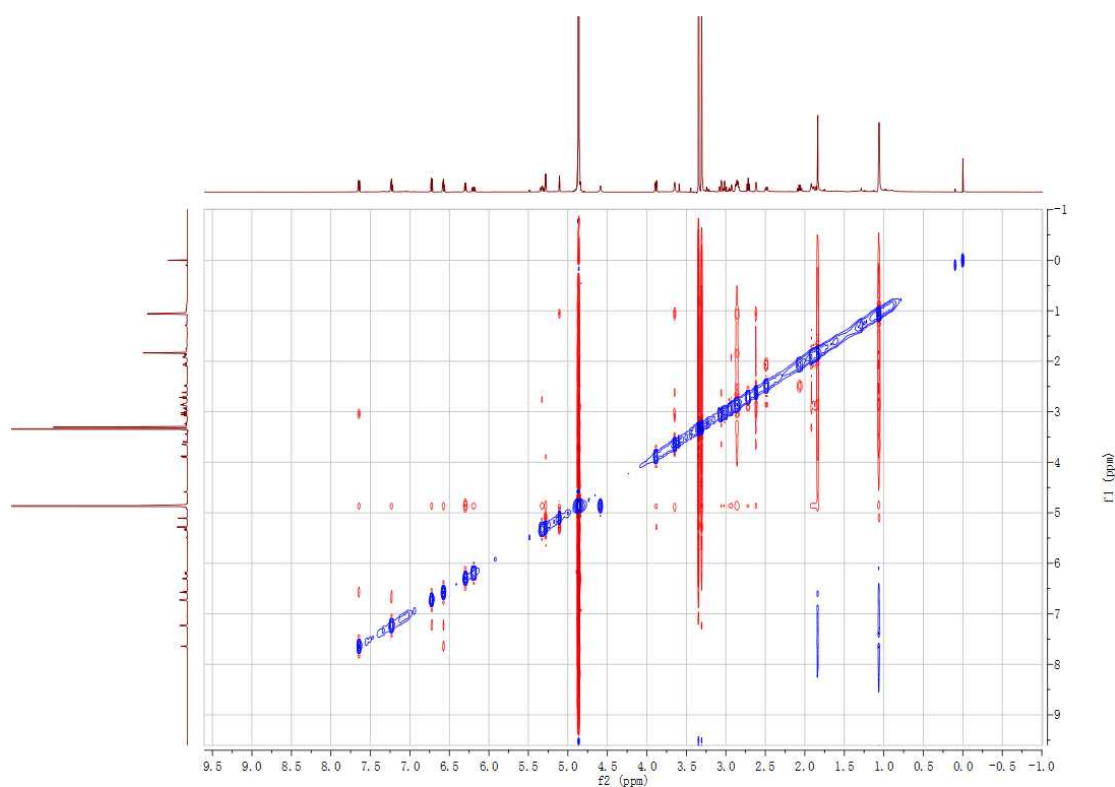

**Figure S13.** NOESY spectrum of **2** (CD<sub>3</sub>OD)

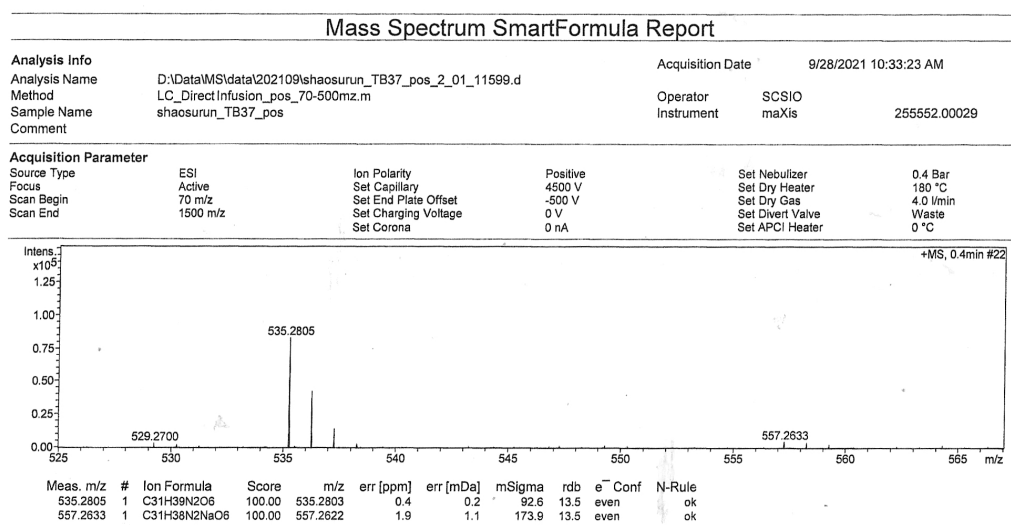

**Figure S14.** HRESIMS spectrum of **2**

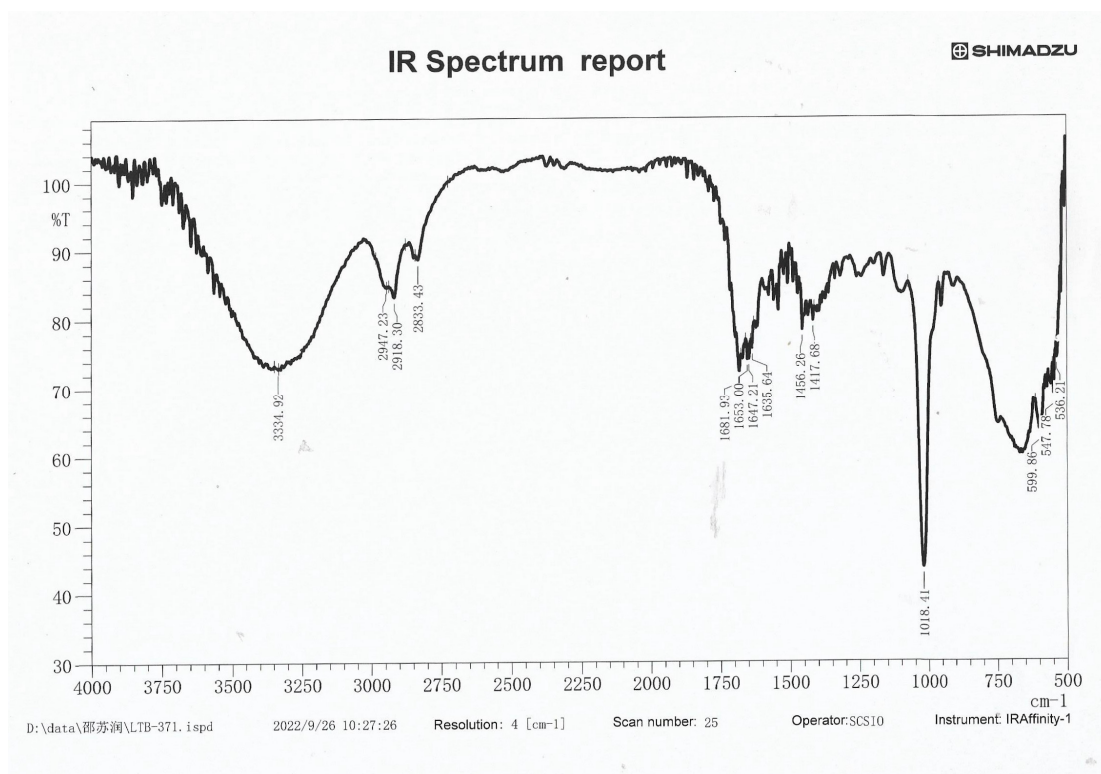

**Figure S15.** IR spectrum of **2**

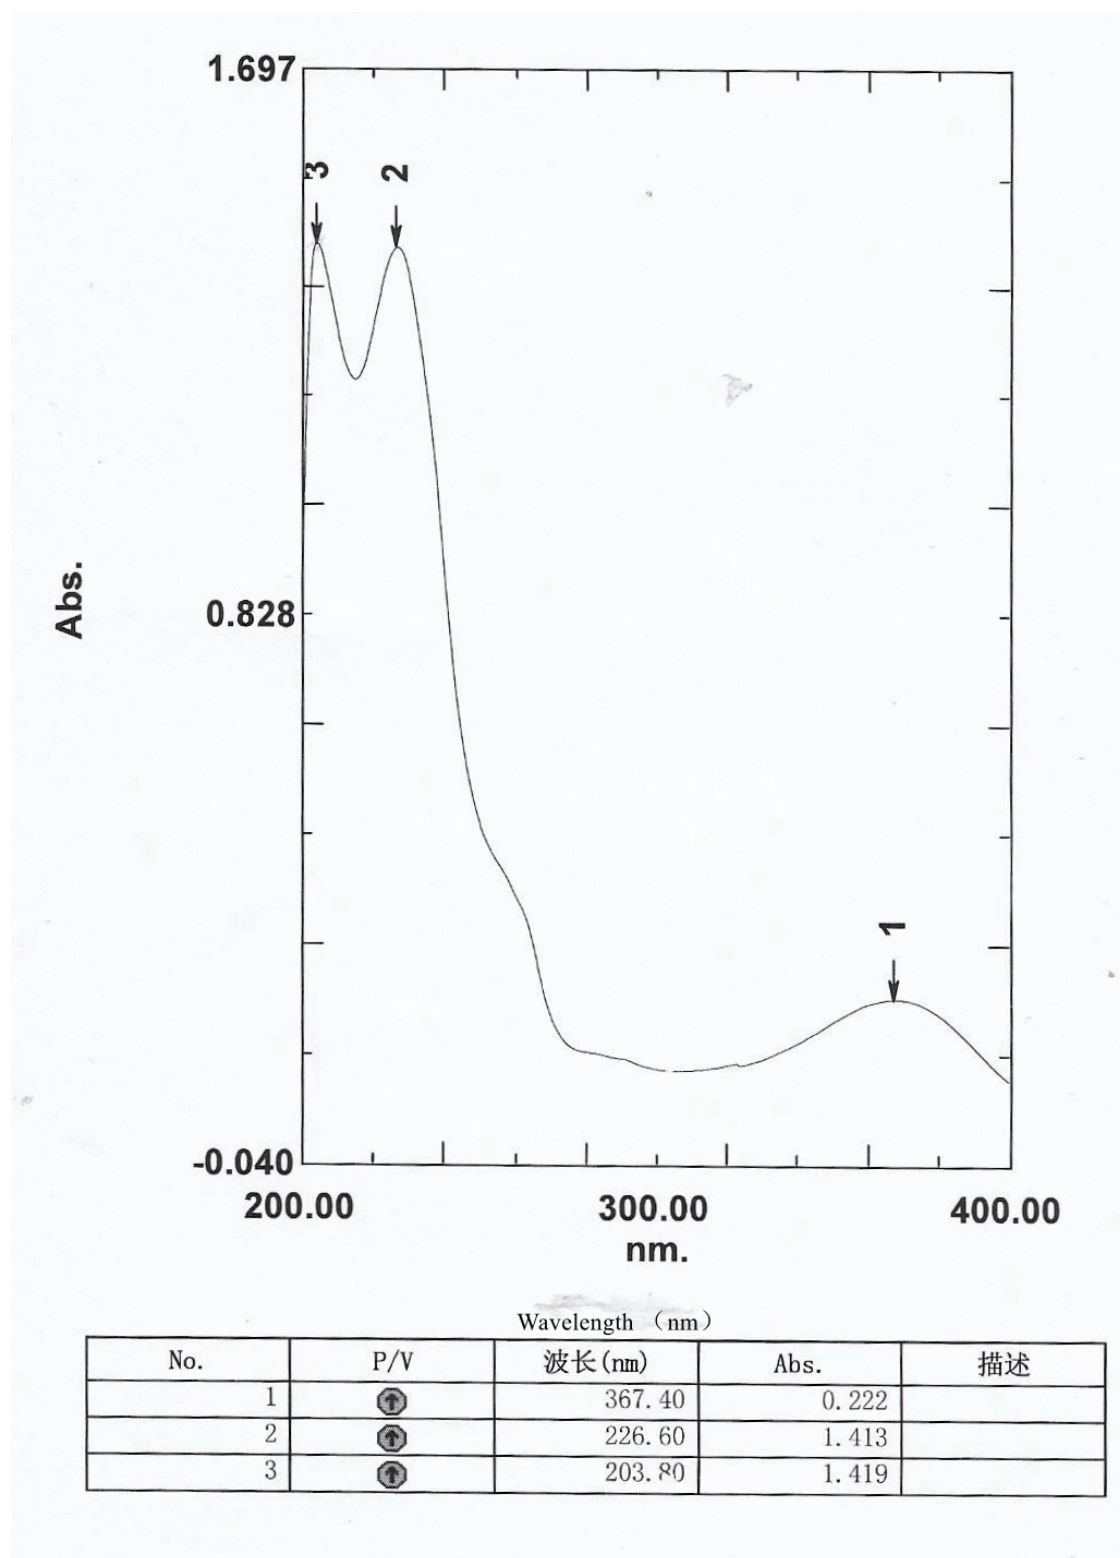

**Figure S16.** UV spectrum of **2**

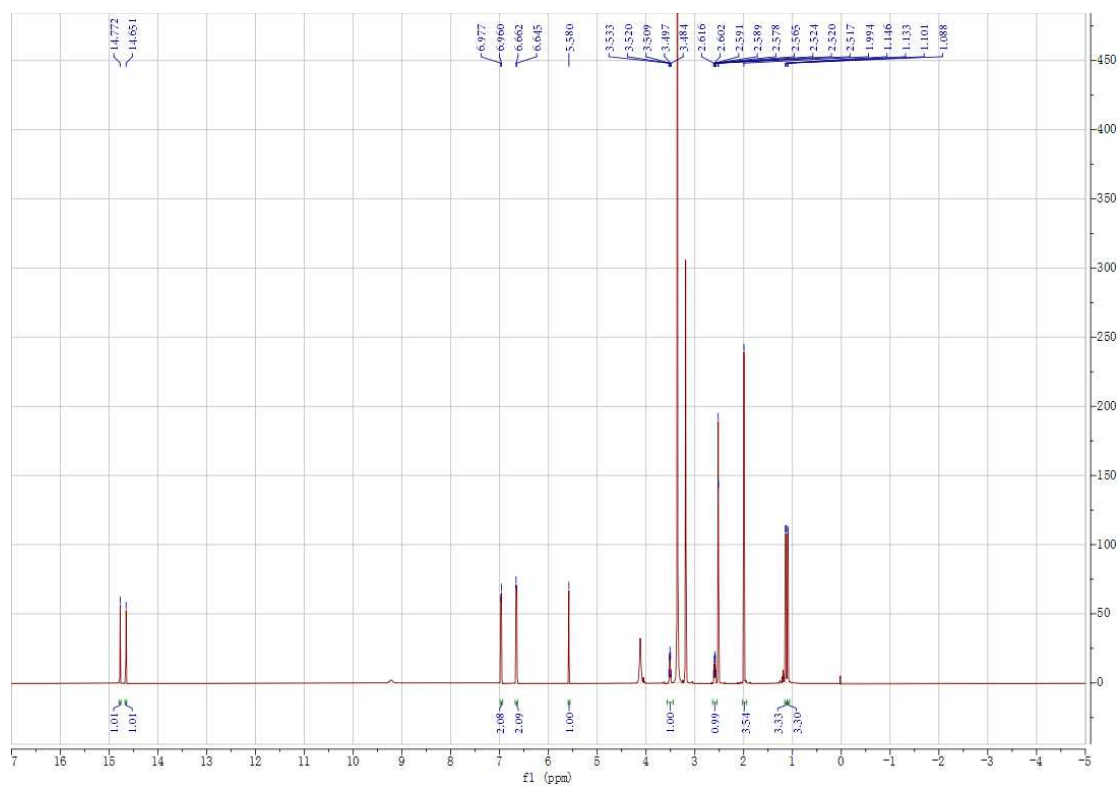

**Figure S17.** <sup>1</sup>H NMR spectrum of **4** (DMSO-*d*<sub>6</sub>, 500 MHz)

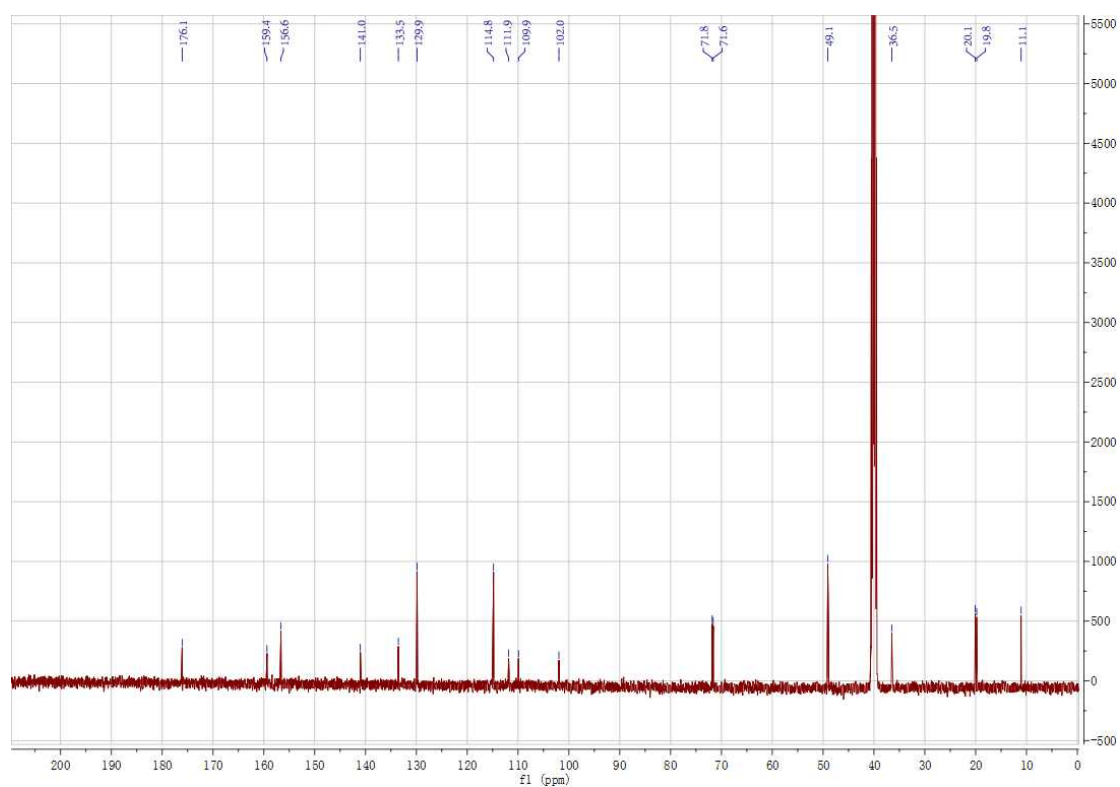

**Figure S18.** <sup>13</sup>C NMR spectrum of **4** (DMSO-*d*<sub>6</sub>, 125 MHz)

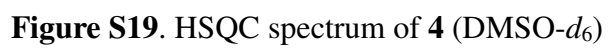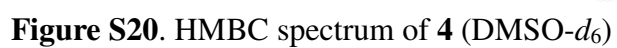

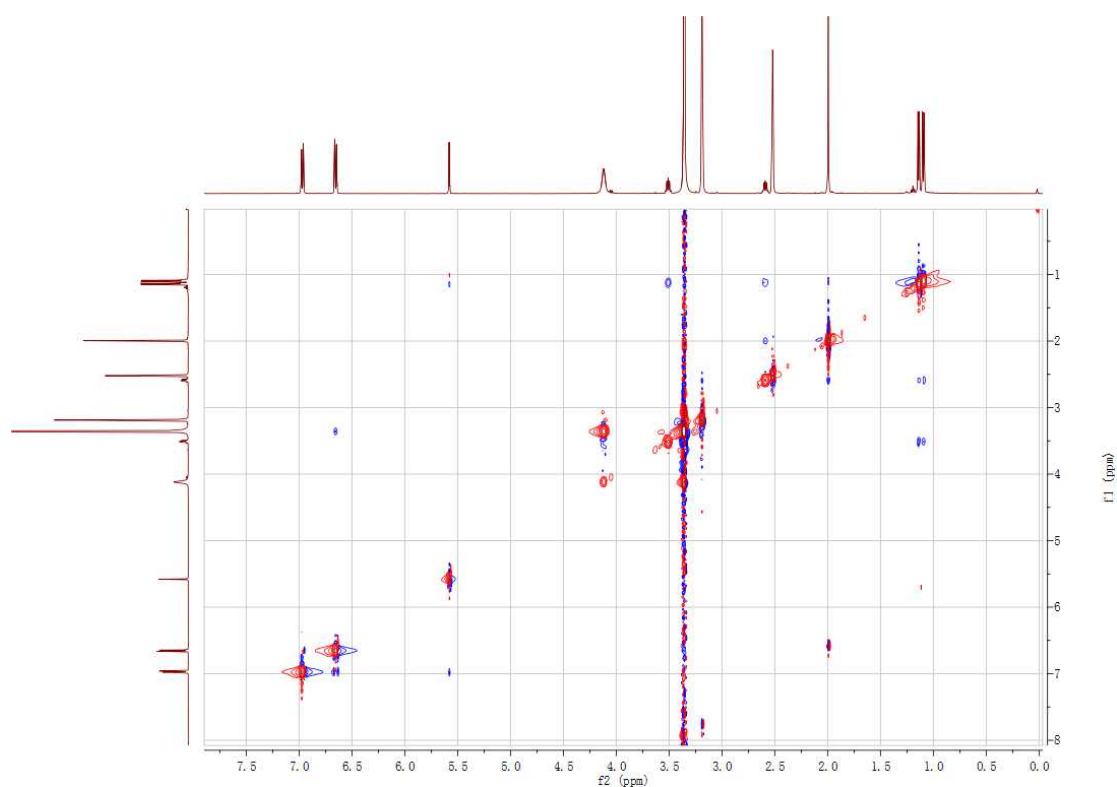

**Figure S21.** NOESY spectrum of **4** (DMSO- $d_6$ )

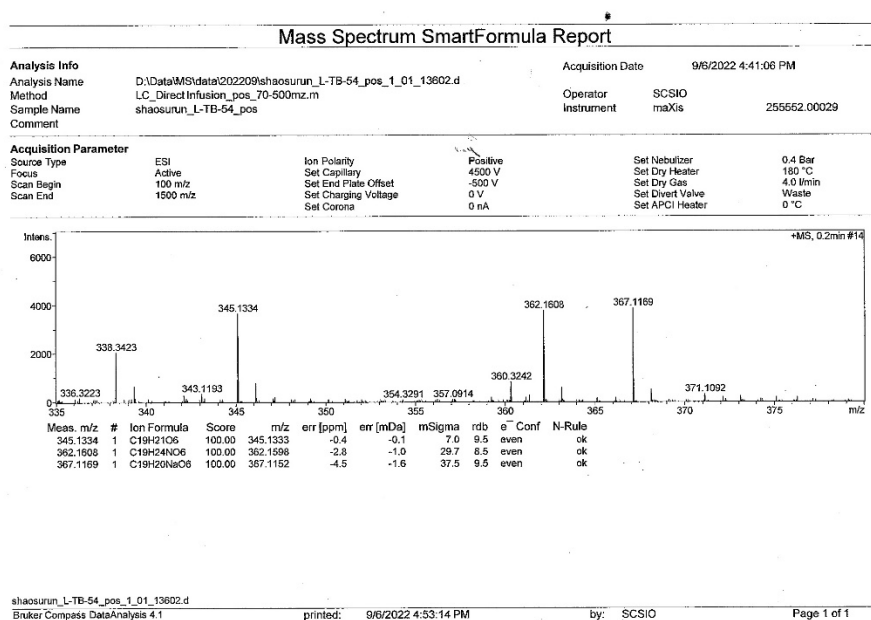

**Figure S22.** HRESIMS spectrum of **4**



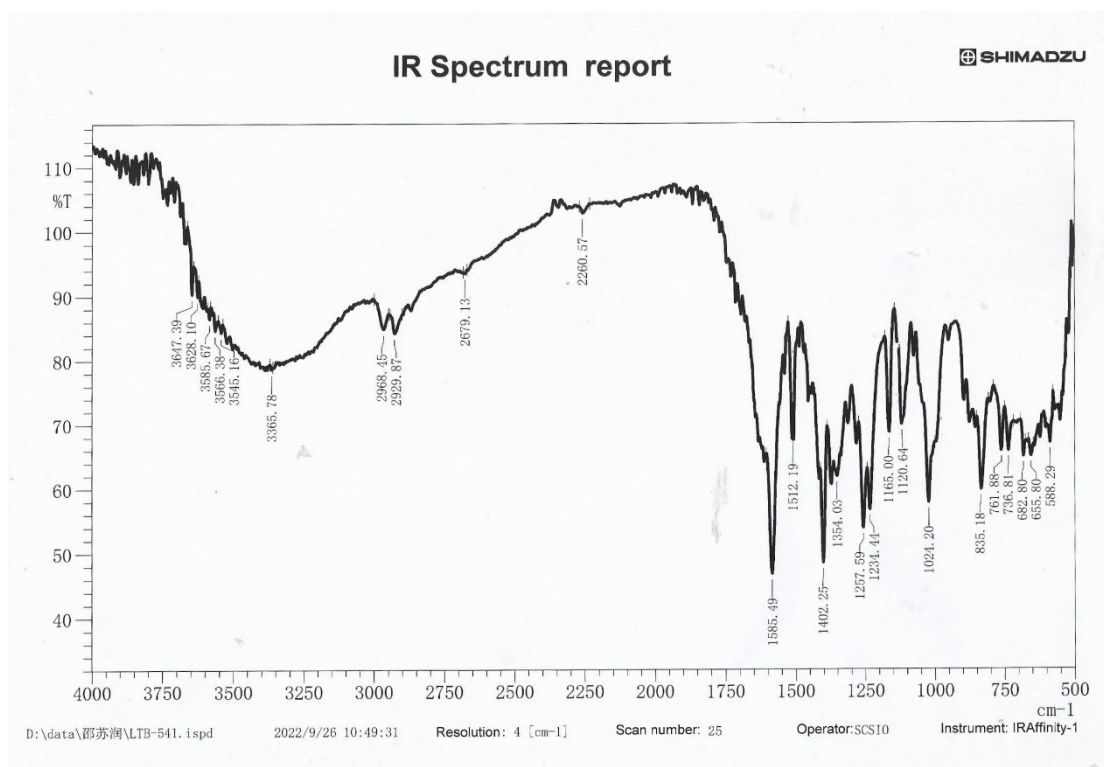

**Figure S23.** IR spectrum of **4**

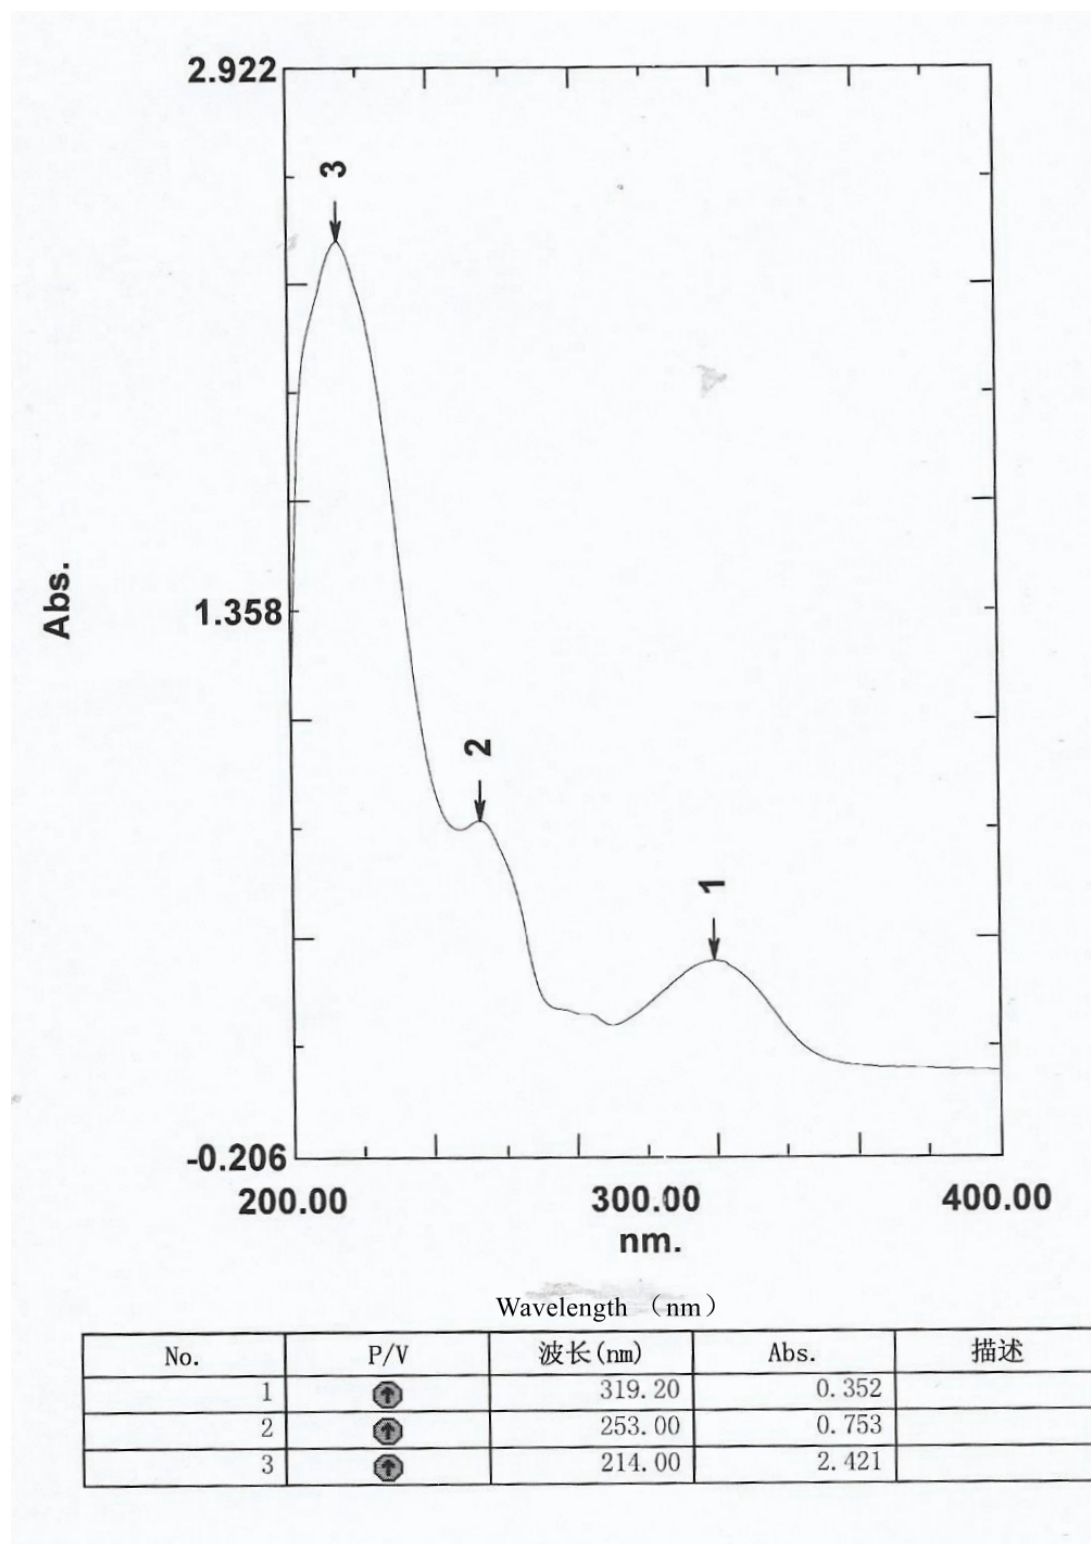

**Figure S24.** UV spectrum of **4**

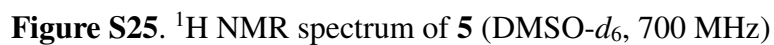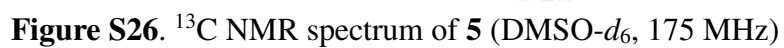

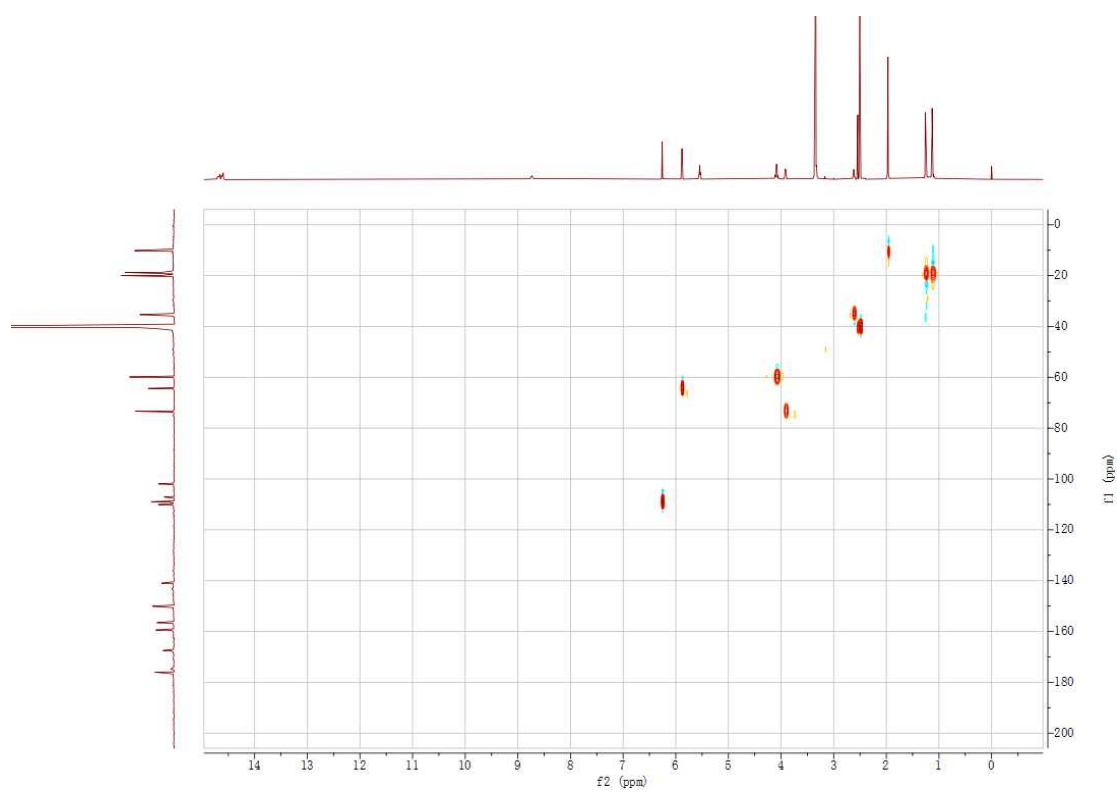

**Figure S27.** HSQC spectrum of **5** (DMSO-*d*<sub>6</sub>)

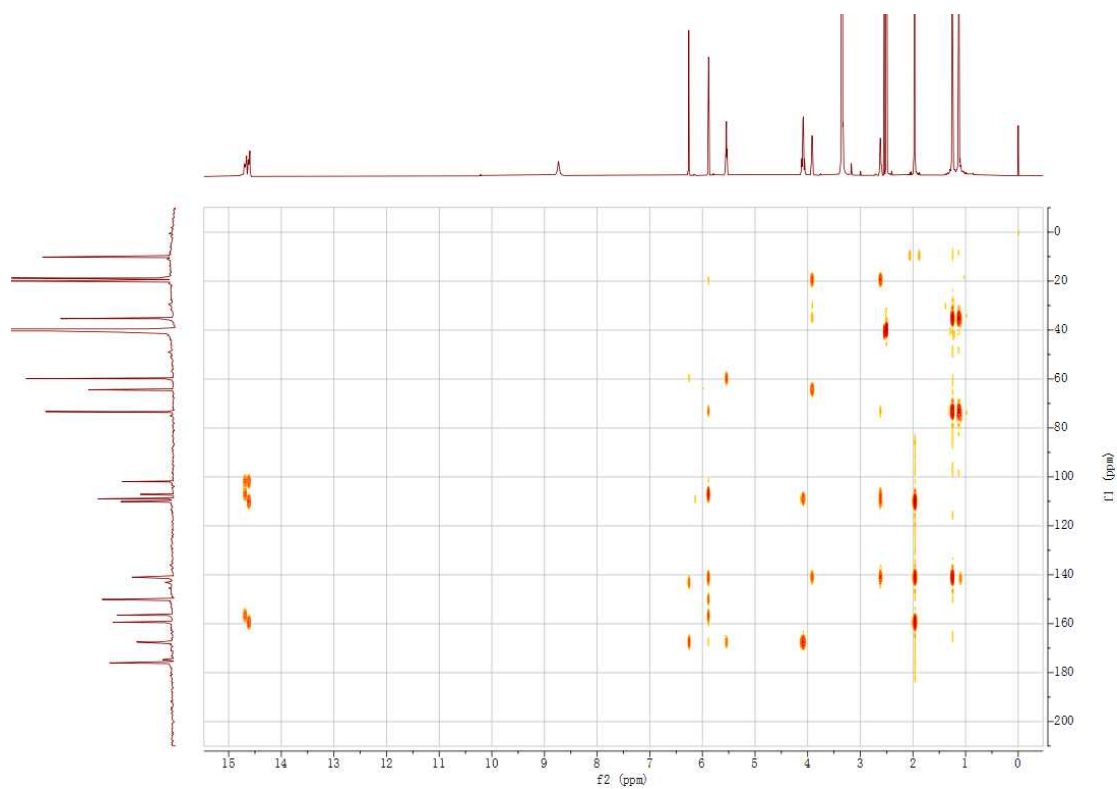

**Figure S28.** HMBC spectrum of **5**(DMSO-*d*<sub>6</sub>)

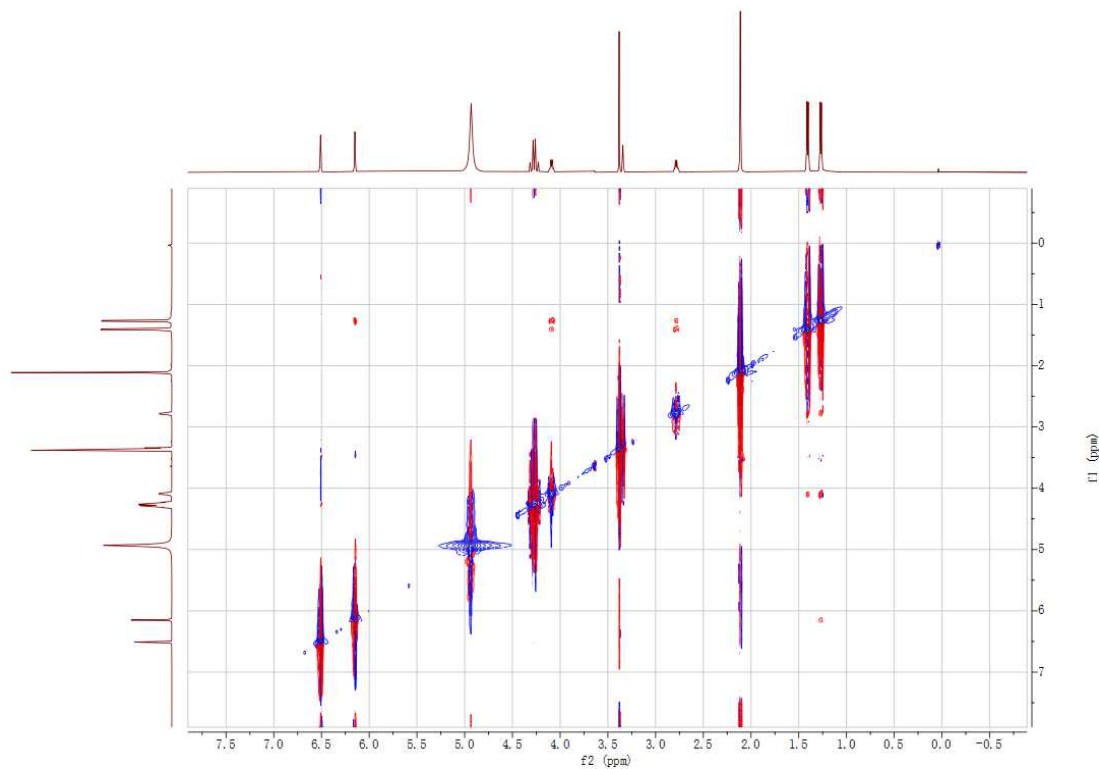

**Figure S29.** NOESY spectrum of **5** (CD<sub>3</sub>OD)

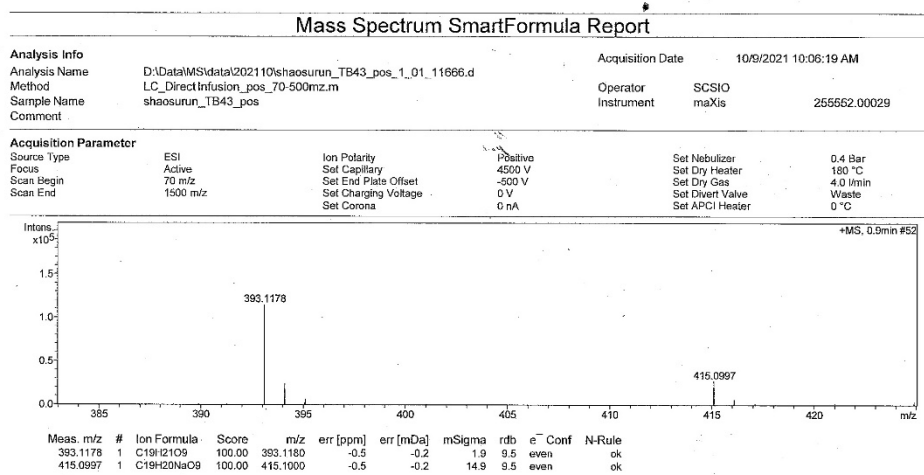

shaosurun\_TB43\_pos\_1\_01\_11666.d  
Bruker Compass DataAnalysis 4.1

printed: 10/9/2021 10:09:34 AM

by: SCSIO

Page 1 of 1

**Figure S30.** HRESIMS spectrum of **5**

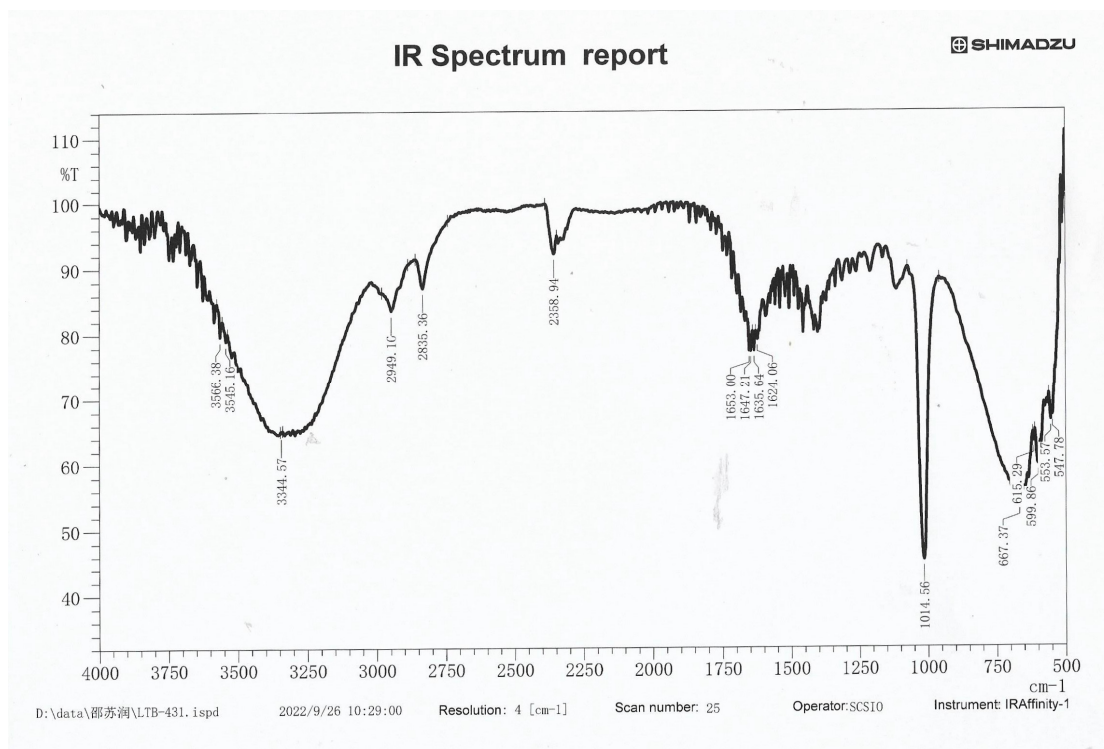

**Figure S31.** IR spectrum of **5**

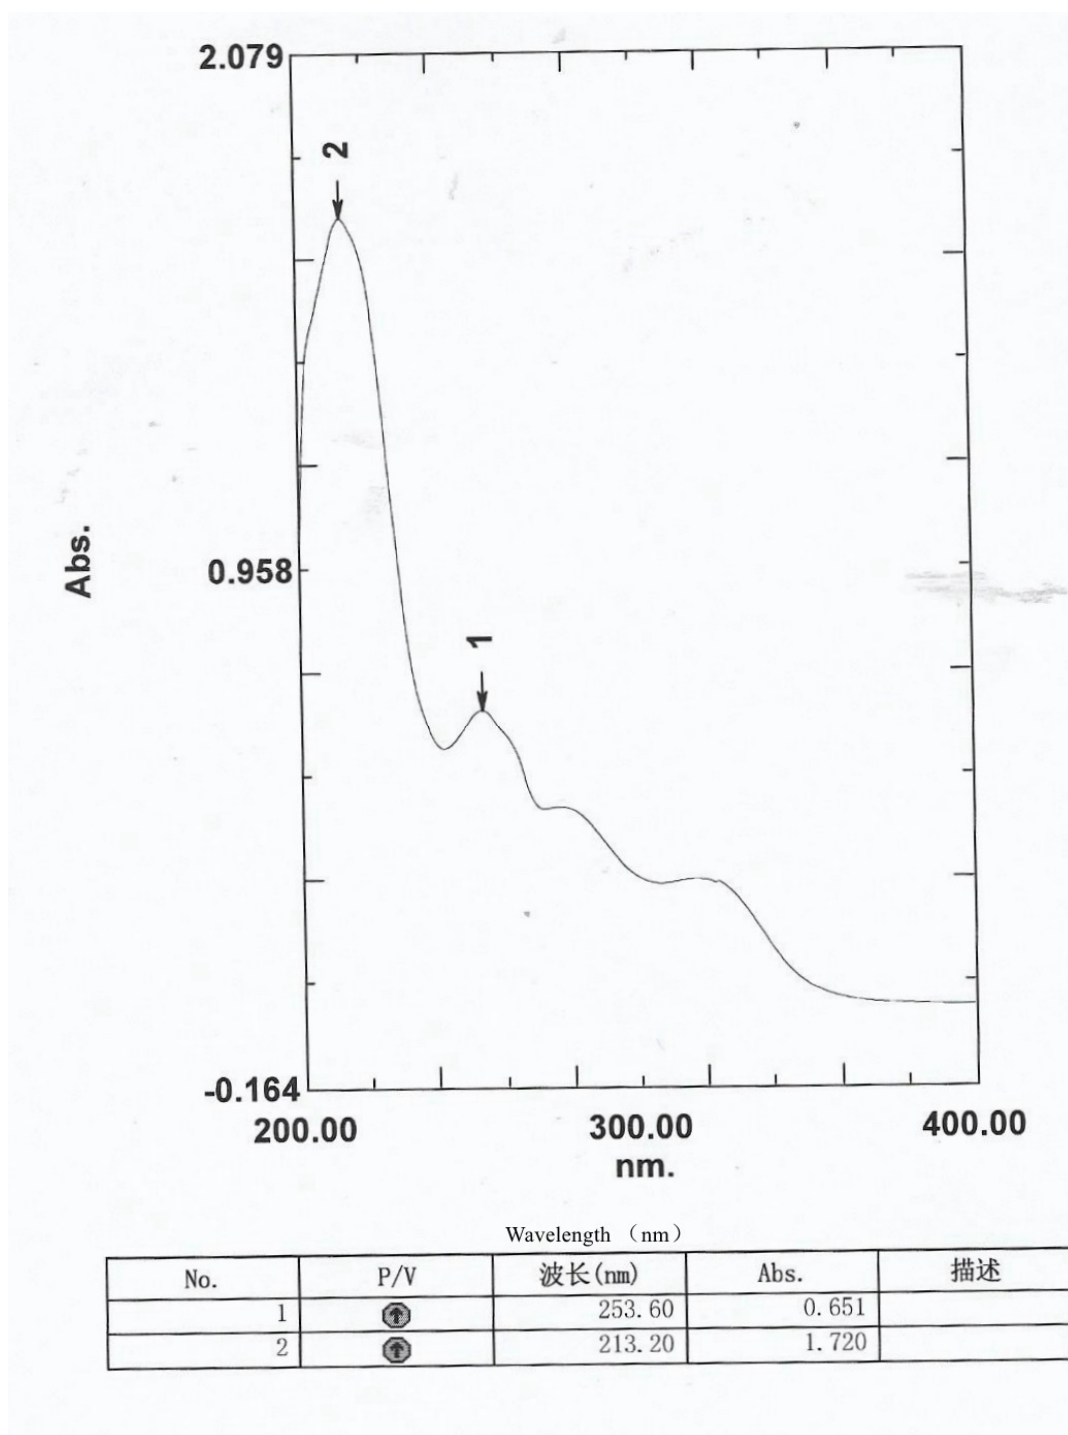

**Figure S32.** UV spectrum of **5**

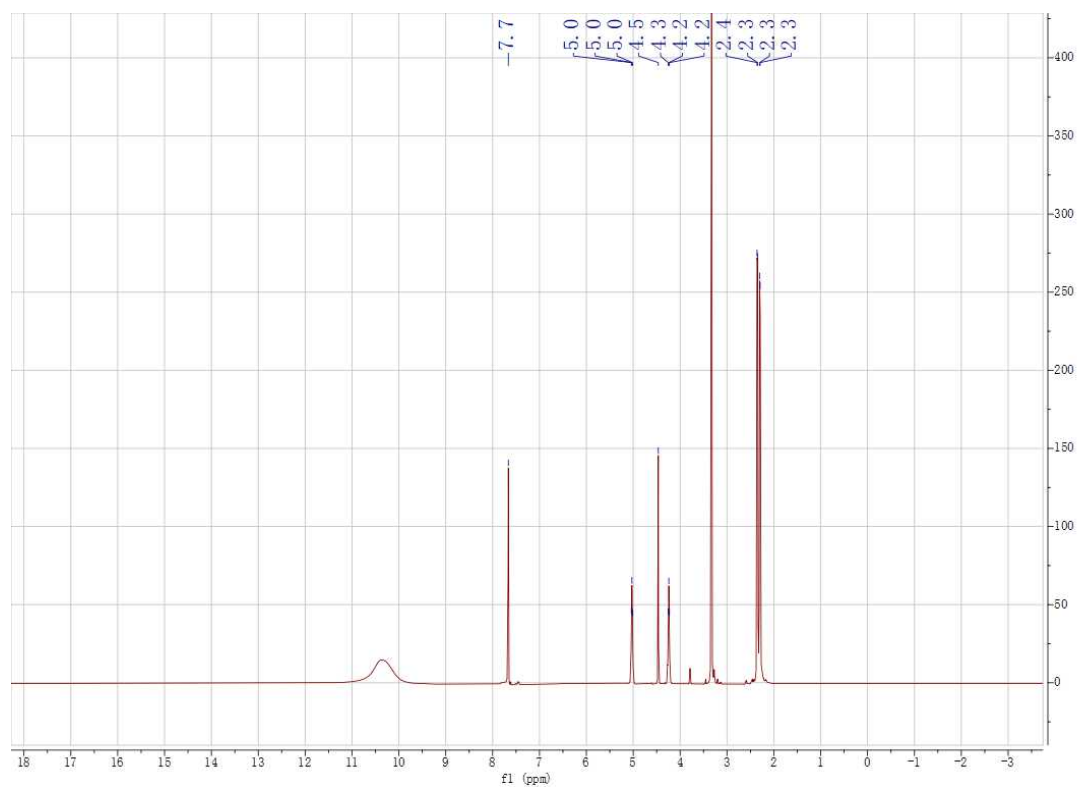

**Figure S33.**  $^1\text{H}$  NMR spectrum of **7** (DMSO- $d_6$ , 700 MHz)

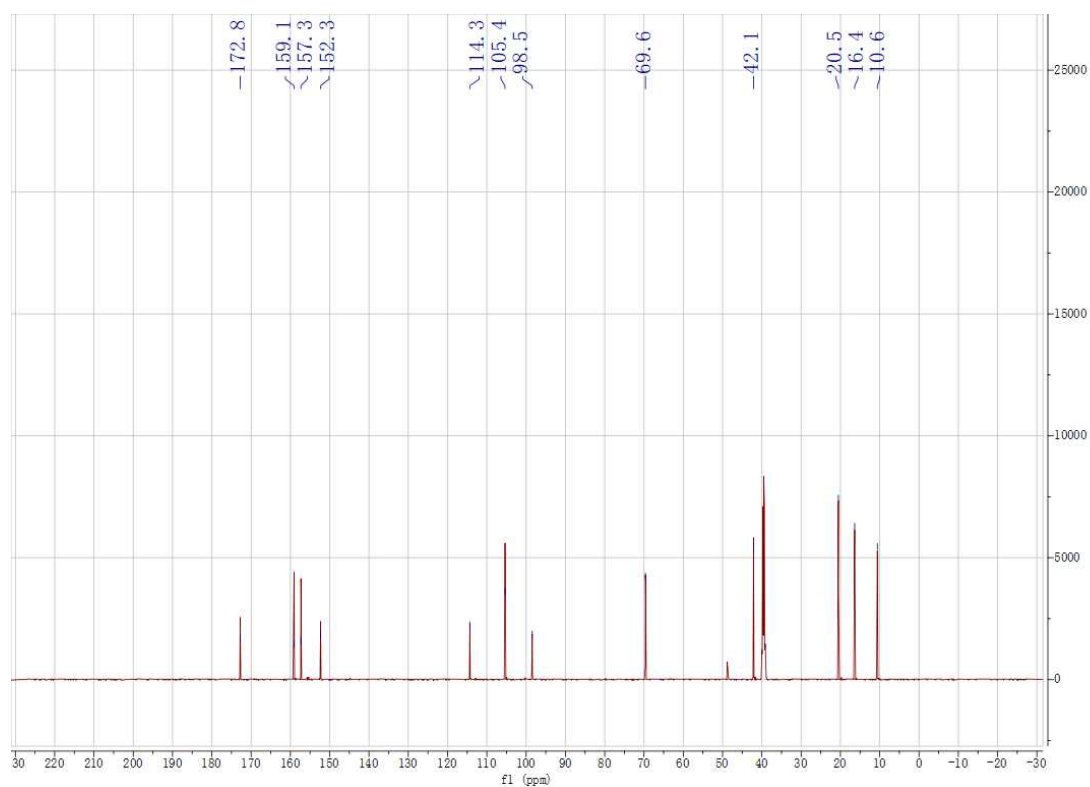

**Figure S34.**  $^{13}\text{C}$  NMR spectrum of **7** (DMSO- $d_6$ , 175 MHz)



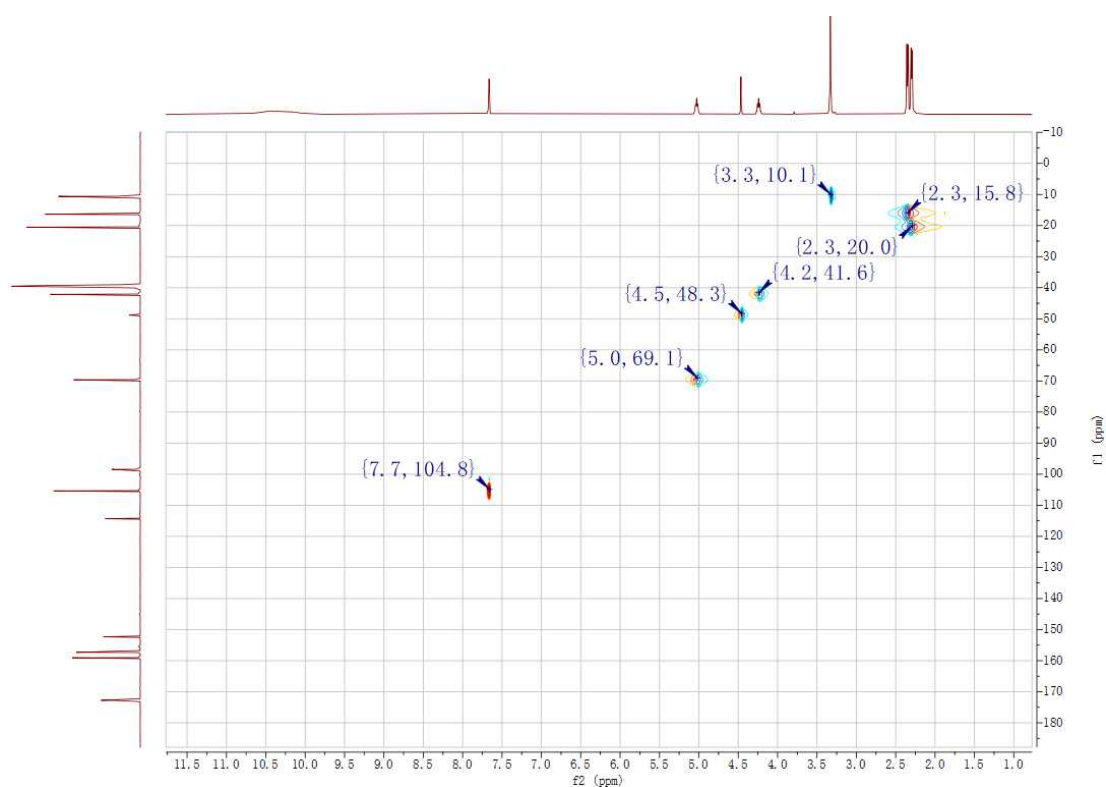

**Figure S35.** HSQC spectrum of **7** (DMSO-*d*<sub>6</sub>)

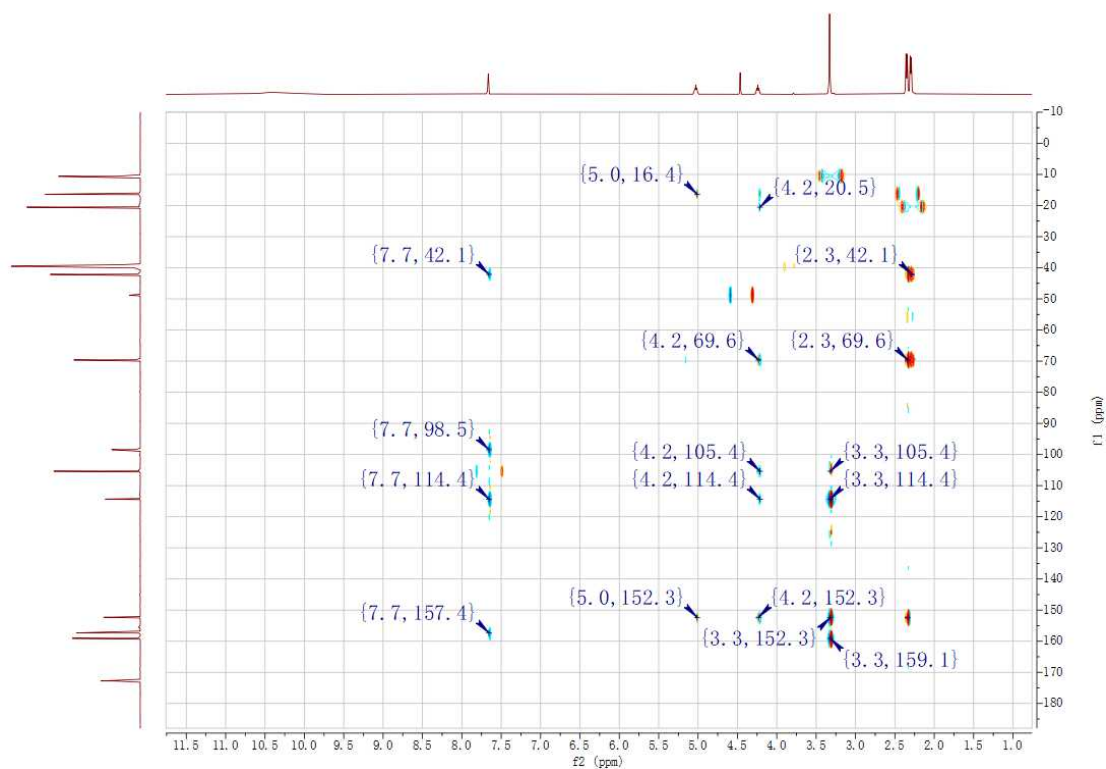

**Figure S36.** HMBC spectrum of **7** (DMSO-*d*<sub>6</sub>)

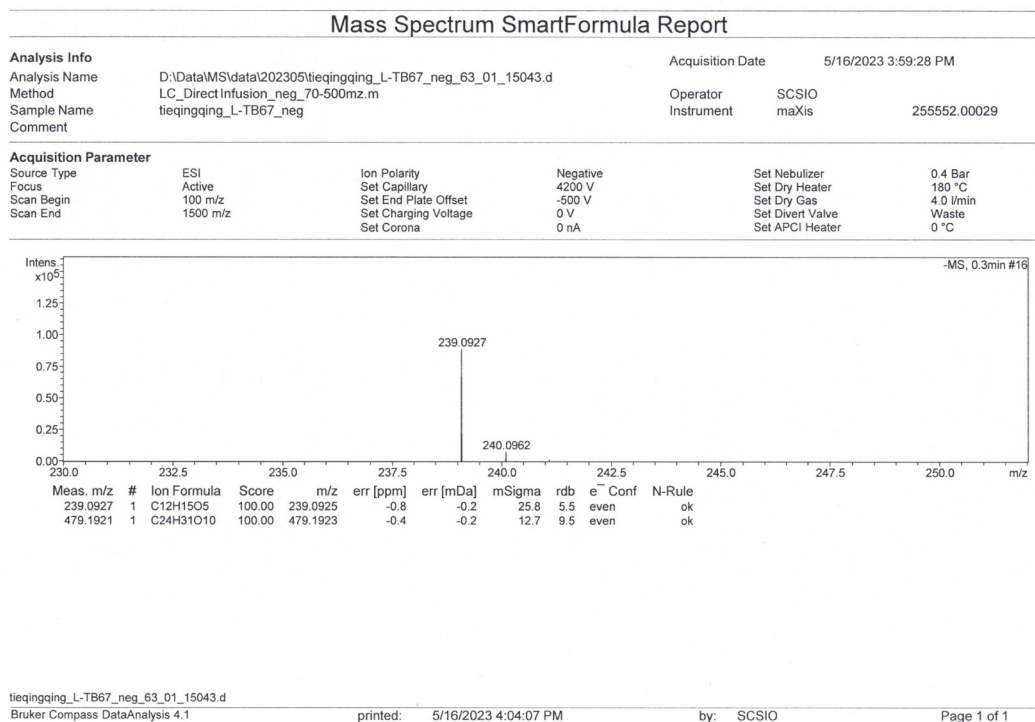

**Figure S37.** HRESIMS spectrum of **7**

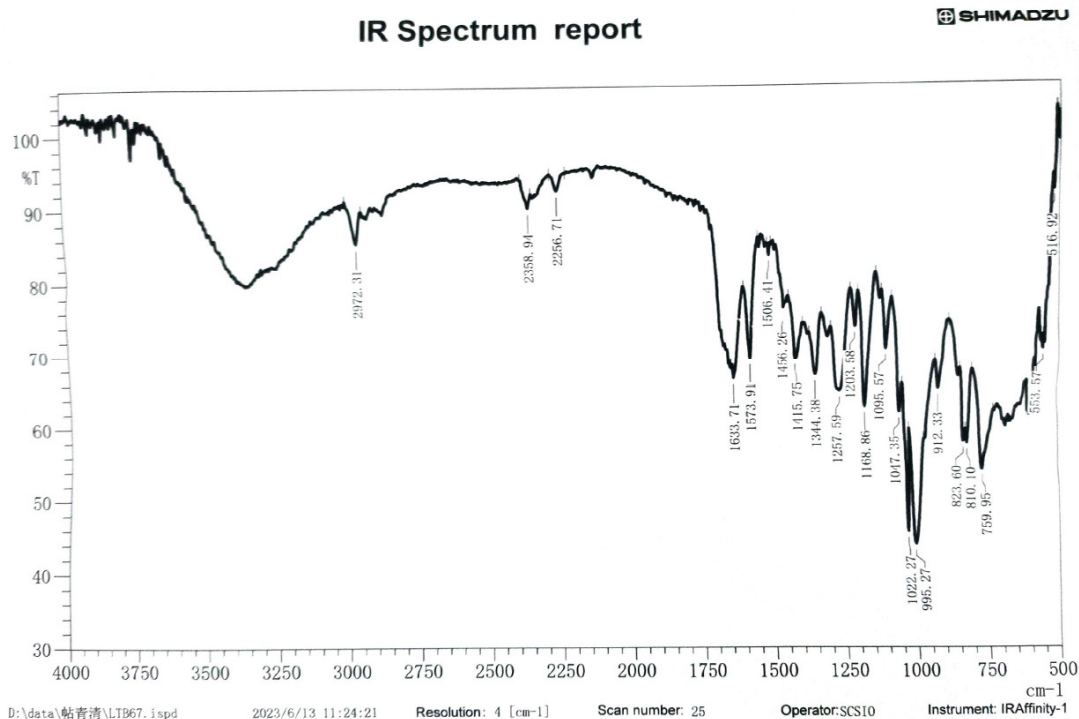

**Figure S38.** IR spectrum of **7**

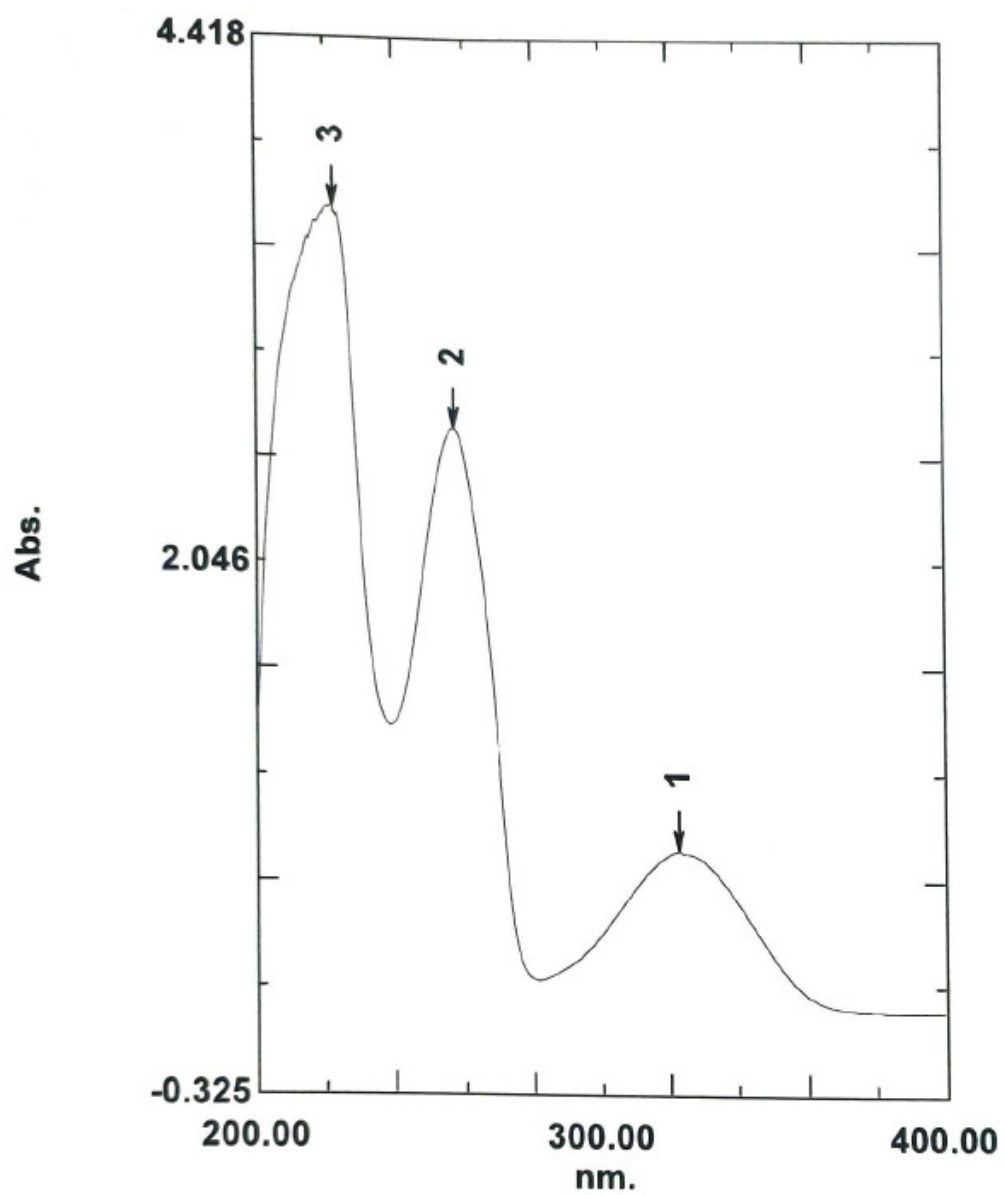

| Wavelength (nm) |     |         |       |    |
|-----------------|-----|---------|-------|----|
| No.             | P/V | 波长 (nm) | Abs.  | 描述 |
| 1               | ①   | 322.60  | 0.757 |    |
| 2               | ②   | 256.80  | 2.656 |    |
| 3               | ③   | 222.20  | 3.658 |    |

**Figure S39.** UV spectrum of **7**

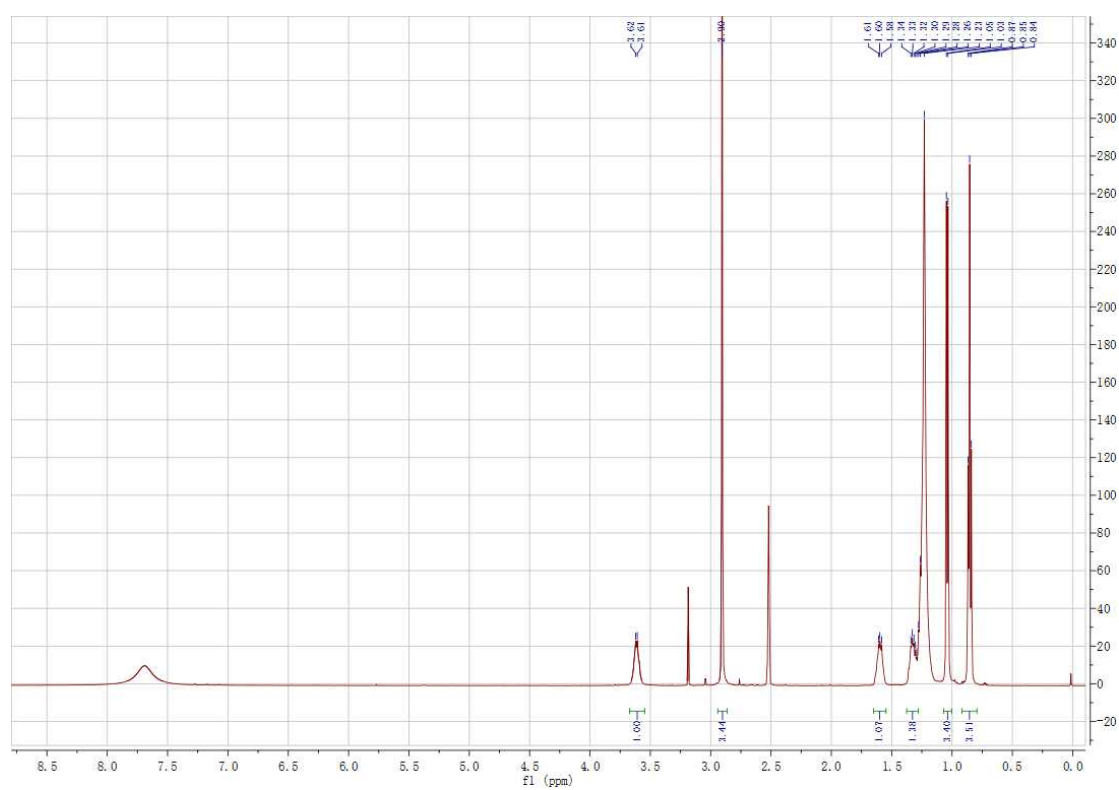

**Figure S40.** <sup>1</sup>H NMR spectrum of **12** (DMSO-*d*<sub>6</sub>, 500 MHz)

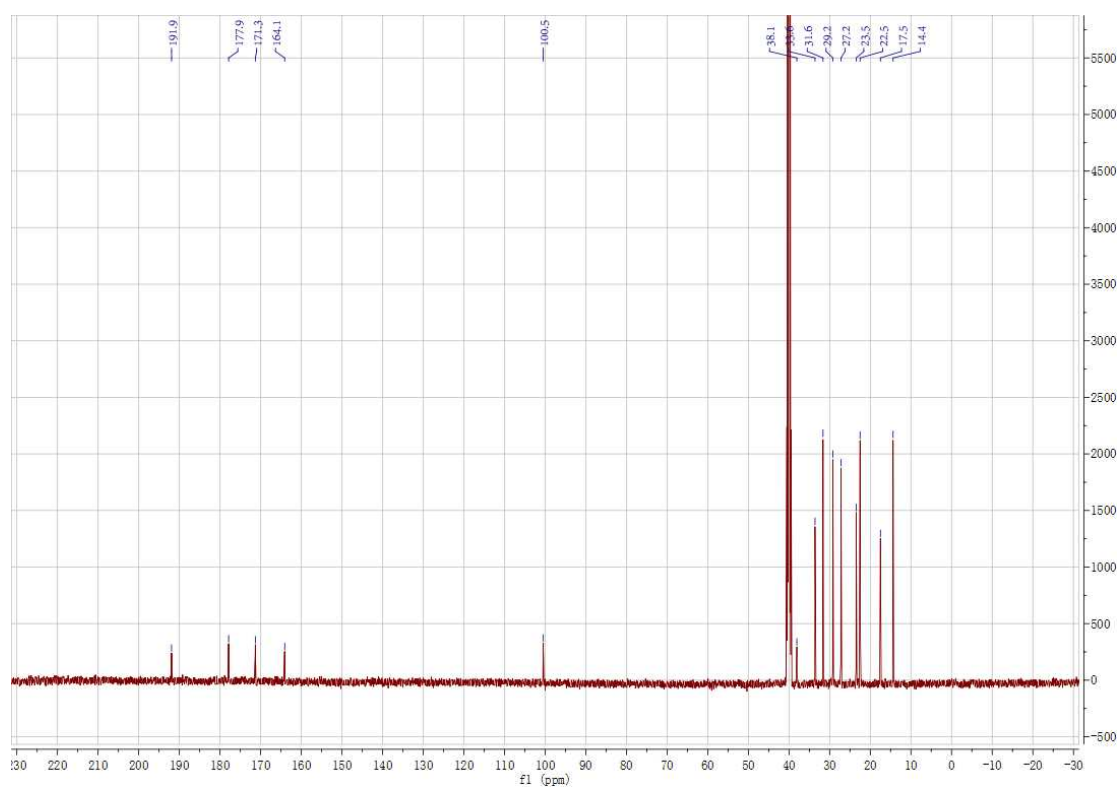

**Figure S41.** <sup>13</sup>C NMR spectrum of **12** (DMSO-*d*<sub>6</sub>, 125 MHz)

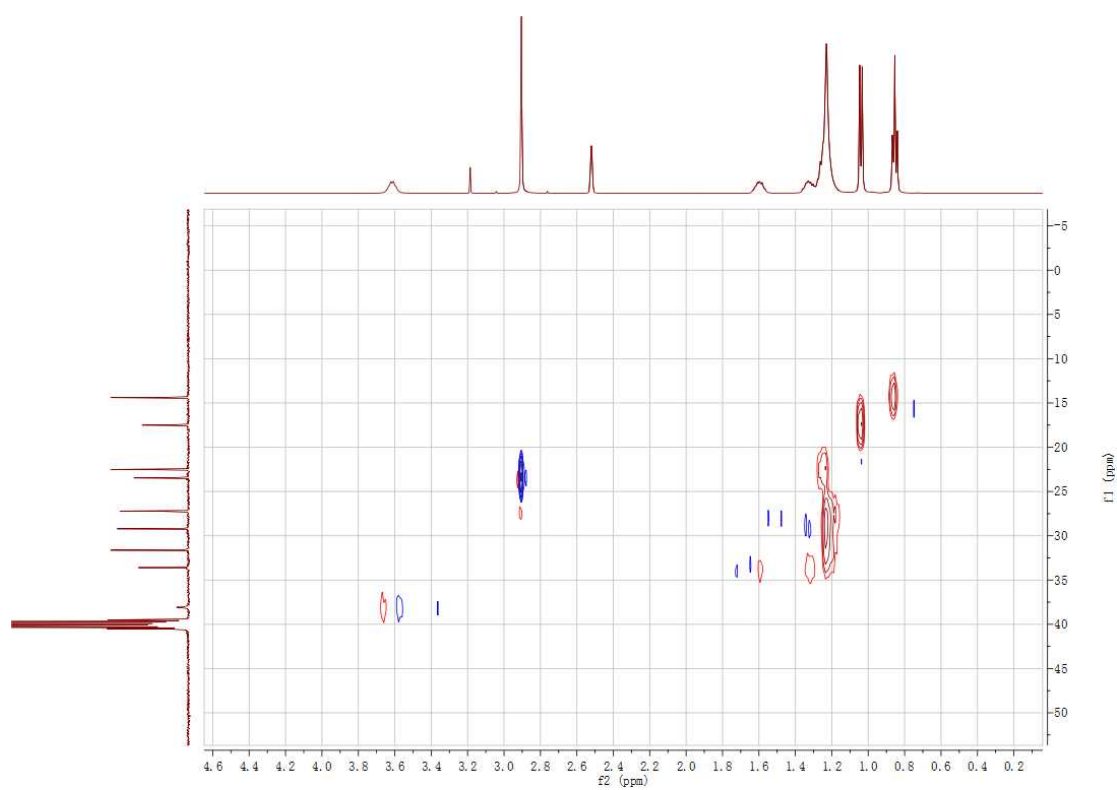

**Figure S42.** HSQC spectrum of **12** (DMSO- $d_6$ )

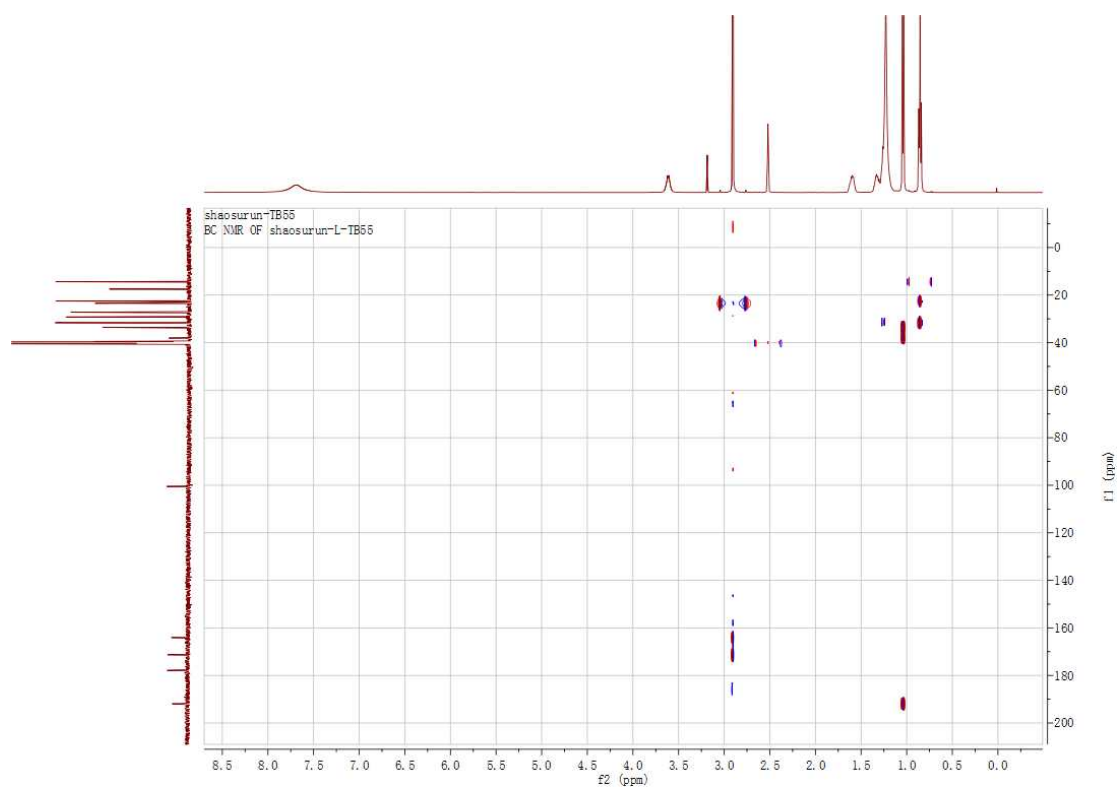

**Figure S43.** HMBC spectrum of **12** (DMSO- $d_6$ )

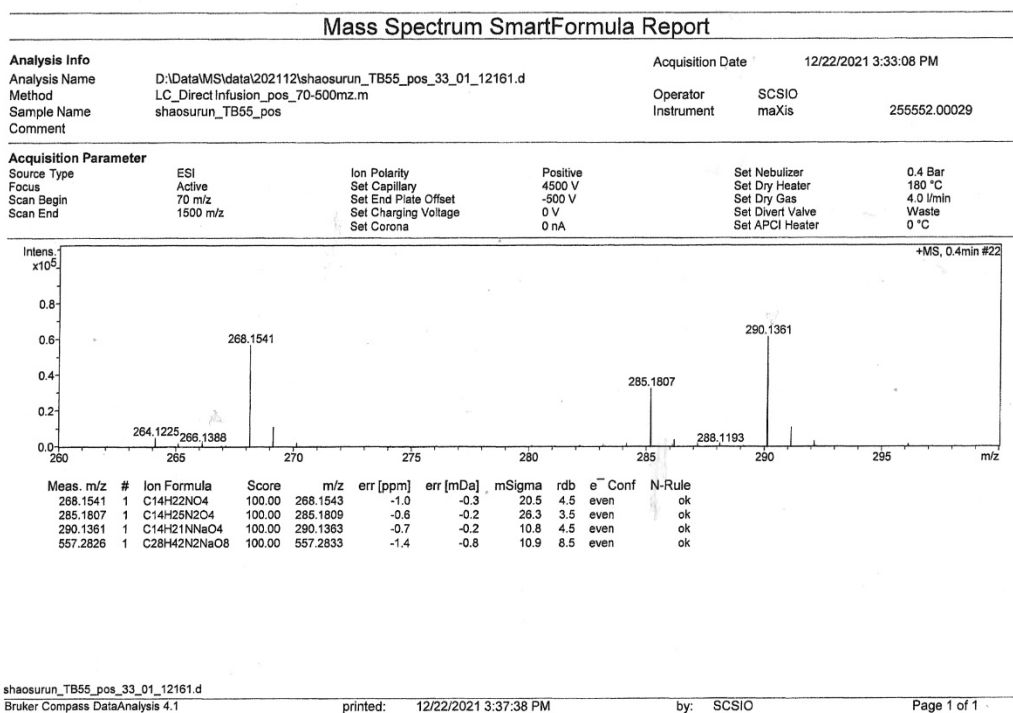

**Figure S44.** HRESIMS spectrum of **12**

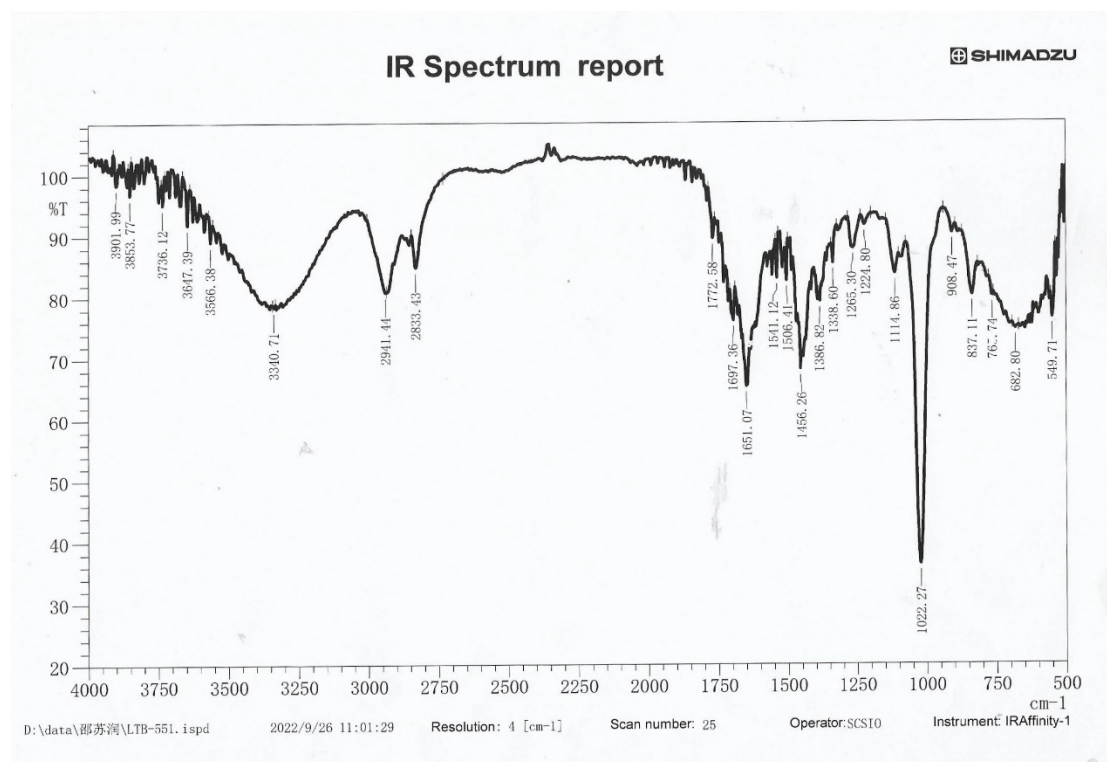

**Figure S45.** IR spectrum of **12**

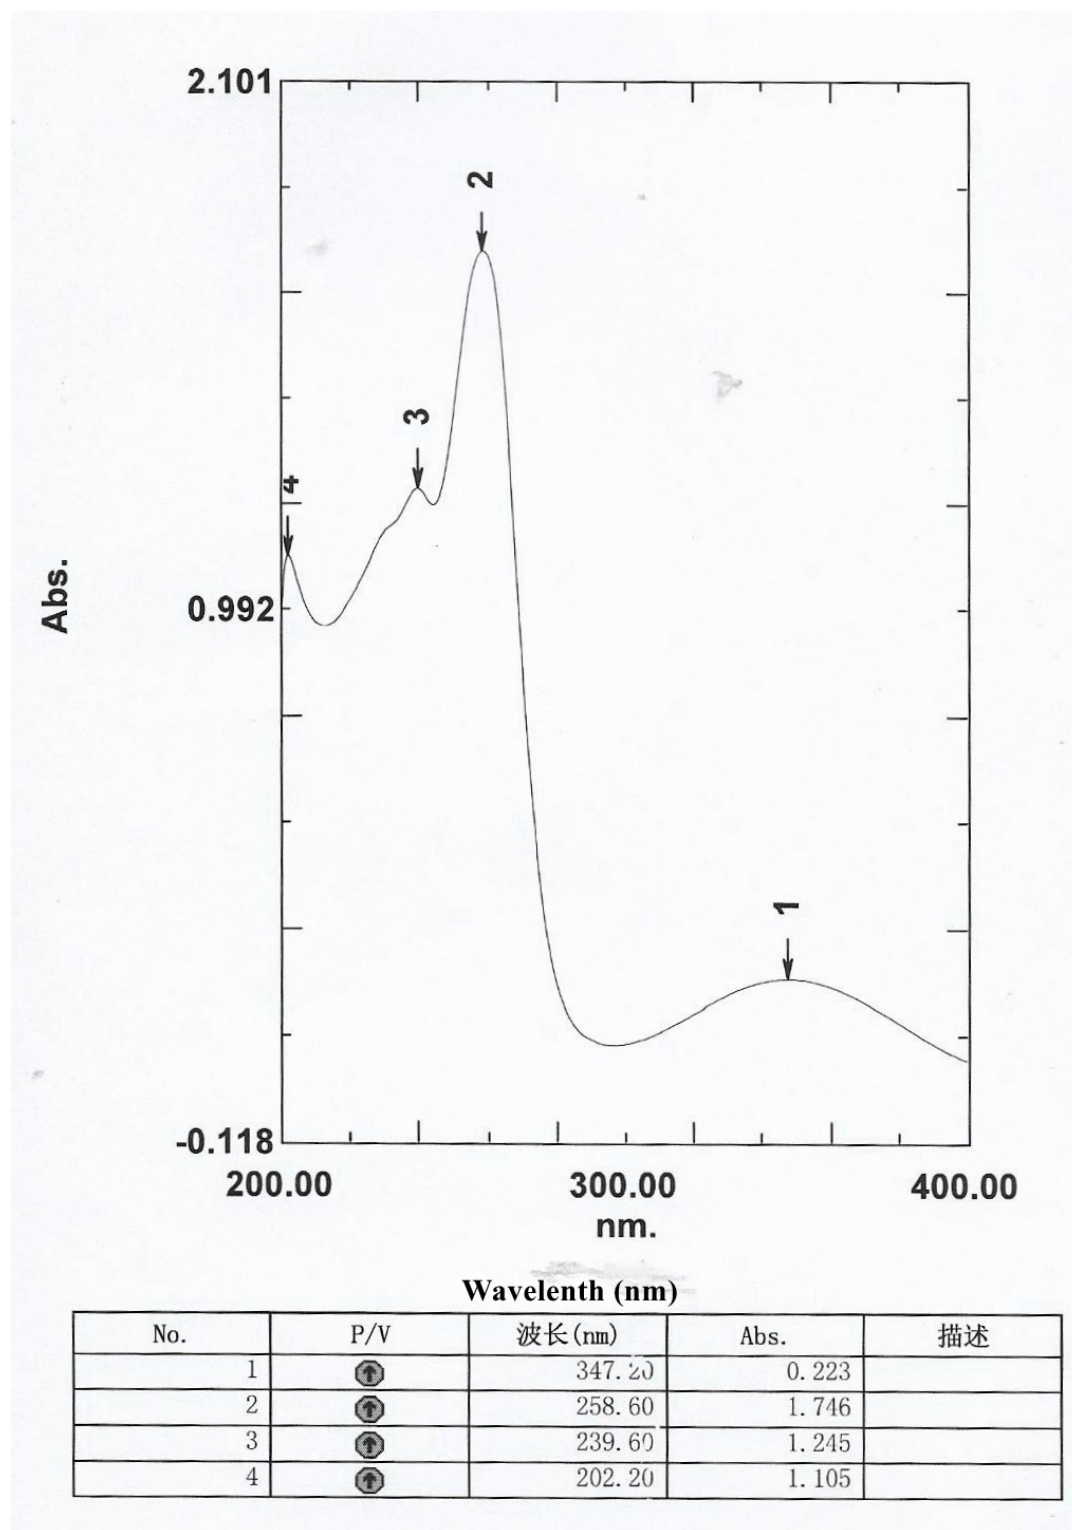

**Figure S46.** UV spectrum of **12**

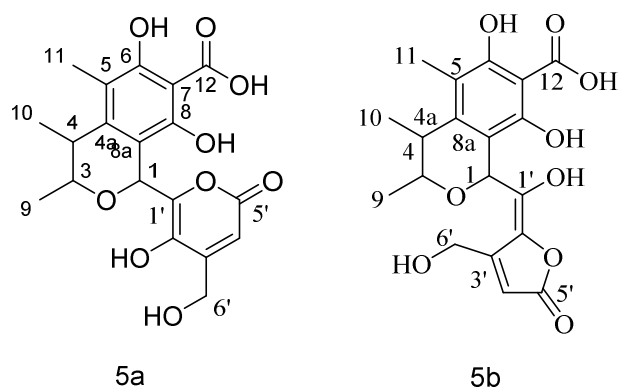

**Figure S47.** The NMR calculations of two candidate structures (**5a** and **5b**)



5a

|                                                                                     |                                                                                     |                                                                                       |
|-------------------------------------------------------------------------------------|-------------------------------------------------------------------------------------|---------------------------------------------------------------------------------------|
| 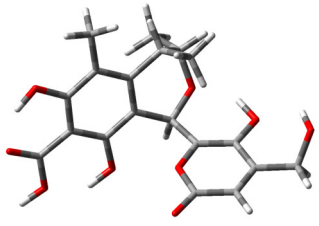   |    |    |
| Conf.1 (7.6%)                                                                       | Conf.2 (6.2%)                                                                       | Conf.3 (2.0%)                                                                         |
|    |    |    |
| Conf.4 (6.2%)                                                                       | Conf.5 (5.1%)                                                                       | Conf.6 (1.7%)                                                                         |
|   |   |   |
| Conf.7 (17.1%)                                                                      | Conf.8 (18.8%)                                                                      | Conf.9 (5.3%)                                                                         |
|  |  |  |
| Conf.10 (3.5%)                                                                      | Conf.11 (3.4%)                                                                      | Conf.12 (9.5%)                                                                        |
|  |  |  |
| Conf.13 (7.8%)                                                                      | Conf.14 (2.6%)                                                                      | Conf.15 (2.9%)                                                                        |

**5b**

|                                                                                     |                                                                                   |                                                                                    |
|-------------------------------------------------------------------------------------|-----------------------------------------------------------------------------------|------------------------------------------------------------------------------------|
| 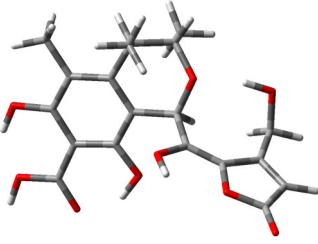   |  |  |
| Conf.1 (25.3%)                                                                      | Conf.2 (3.5%)                                                                     | Conf.3 (2.1%)                                                                      |
|    |  |  |
| Conf.4 (31.1%)                                                                      | Conf.11 (5.8%)                                                                    | Conf.12 (13.9%)                                                                    |
|  |                                                                                   |                                                                                    |
| Conf.13 (17.0%)                                                                     |                                                                                   |                                                                                    |

**Figure S48.** The optimized conformers and equilibrium populations of **5a** and **5b**

**Table S1.** Energies of **5** at MMFF94 force field

| Configuration | Conformer | Energy (kJ/mol) | Population (%) |
|---------------|-----------|-----------------|----------------|
| <b>5a</b>     | 1         | 245.12          | 18.1           |
| <b>5a</b>     | 2         | 245.29          | 16.9           |
| <b>5a</b>     | 3         | 245.71          | 14.3           |
| <b>5a</b>     | 4         | 246.47          | 10.5           |
| <b>5a</b>     | 5         | 246.92          | 8.8            |
| <b>5a</b>     | 6         | 247.46          | 7.1            |
| <b>5a</b>     | 7         | 249.52          | 3.1            |
| <b>5a</b>     | 8         | 249.69          | 2.9            |
| <b>5a</b>     | 9         | 250.03          | 2.5            |
| <b>5a</b>     | 10        | 250.41          | 2.1            |
| <b>5a</b>     | 11        | 250.55          | 2.0            |
| <b>5a</b>     | 12        | 250.61          | 2.0            |
| <b>5a</b>     | 13        | 251.11          | 1.6            |
| <b>5a</b>     | 14        | 251.56          | 1.3            |
| <b>5a</b>     | 15        | 251.83          | 1.2            |
| <b>5b</b>     | 1         | 270.60          | 18.8           |
| <b>5b</b>     | 2         | 270.77          | 17.5           |
| <b>5b</b>     | 3         | 270.85          | 17.0           |
| <b>5b</b>     | 4         | 271.10          | 15.4           |
| <b>5b</b>     | 5         | 272.58          | 8.4            |
| <b>5b</b>     | 6         | 273.03          | 7.1            |
| <b>5b</b>     | 7         | 274.88          | 3.3            |
| <b>5b</b>     | 8         | 275.42          | 2.7            |
| <b>5b</b>     | 9         | 276.76          | 1.6            |
| <b>5b</b>     | 10        | 276.93          | 1.5            |
| <b>5b</b>     | 11        | 277.49          | 1.2            |
| <b>5b</b>     | 12        | 277.65          | 1.1            |
| <b>5b</b>     | 13        | 278.25          | 0.9            |

**Table S2.** Energies of **5** at B3LYP/6–31+G(d, p) level in methanol

| Configuration | Conformer | E (Hartree)   | E (kcal/mol)      | Population (%) |
|---------------|-----------|---------------|-------------------|----------------|
| <b>5a</b>     | 1         | -1413.2151505 | -886806.639090255 | 7.6            |
| <b>5a</b>     | 2         | -1413.2149512 | -886806.514027512 | 6.2            |
| <b>5a</b>     | 3         | -1413.2139306 | -886805.873590806 | 2.0            |
| <b>5a</b>     | 4         | -1413.2149615 | -886806.520490865 | 6.2            |
| <b>5a</b>     | 5         | -1413.2147744 | -886806.403083744 | 5.1            |
| <b>5a</b>     | 6         | -1413.2137505 | -886805.760576255 | 1.7            |
| <b>5a</b>     | 7         | -1413.2159133 | -886807.117754883 | 17.1           |
| <b>5a</b>     | 8         | -1413.2160064 | -886807.176176064 | 18.9           |
| <b>5a</b>     | 9         | -1413.2148047 | -886806.422097297 | 5.3            |
| <b>5a</b>     | 10        | -1413.2144186 | -886806.179815686 | 3.5            |
| <b>5a</b>     | 11        | -1413.2144315 | -886806.187910565 | 3.4            |
| <b>5a</b>     | 12        | -1413.2153618 | -886806.771683118 | 9.5            |
| <b>5a</b>     | 13        | -1413.2151724 | -886806.652832724 | 7.8            |
| <b>5a</b>     | 14        | -1413.2141327 | -886806.000410577 | 2.6            |
| <b>5a</b>     | 15        | -1413.2142439 | -886806.070189689 | 2.9            |
| <b>5b</b>     | 1         | -1413.21398   | -886805.9045898   | 25.3           |
| <b>5b</b>     | 2         | -1413.2121165 | -886804.735224915 | 3.5            |
| <b>5b</b>     | 3         | -1413.2116154 | -886804.420779654 | 2.1            |
| <b>5b</b>     | 4         | -1413.2141763 | -886806.027770013 | 31.1           |
| <b>5b</b>     | 5         | -1413.2088589 | -886802.691048339 | 0.1            |
| <b>5b</b>     | 6         | -1413.2087708 | -886802.635764708 | 0.1            |
| <b>5b</b>     | 7         | -1413.2096562 | -886803.191362062 | 0.2            |
| <b>5b</b>     | 8         | -1413.2100148 | -886803.416387148 | 0.4            |
| <b>5b</b>     | 9         | -1413.2094884 | -886803.086065884 | 0.2            |
| <b>5b</b>     | 10        | -1413.209393  | -886803.02620143  | 0.2            |
| <b>5b</b>     | 11        | -1413.2093962 | -886803.028209462 | 5.8            |
| <b>5b</b>     | 12        | -1413.2134105 | -886805.547222855 | 13.9           |
| <b>5b</b>     | 13        | -1413.2136055 | -886805.669587305 | 17.0           |

**Table S3.** DP4+ analysis of calculated  $^1\text{H}$  &  $^{13}\text{C}$  NMR data of **5a** and **5b**  
(experimental for **5**, isomers **1** and **2** for **5a** and **5b**, respectively)

| A          | B    | C            | D        | E            | F        | G               | H        |
|------------|------|--------------|----------|--------------|----------|-----------------|----------|
| Functional |      | Solvent?     |          | Basis Set    |          | Type of Data    |          |
| mPW1PW91   |      | PCM          |          | 6-311G(d, p) |          | Unscaled Shifts |          |
|            |      | DP4+         | 0.02%    | 99.98%       | –        | –               | –        |
| Nuclei     | sp2? | Experimental | Isomer 1 | Isomer 2     | Isomer 3 | Isomer 4        | Isomer 5 |
| C          |      | 64.4         | 69.8     | 71.5         |          |                 |          |
| C          |      | 73.3         | 79.6     | 79.1         |          |                 |          |
| C          |      | 35.3         | 41.0     | 40.8         |          |                 |          |
| C          | x    | 141          | 156.9    | 157.5        |          |                 |          |
| C          | x    | 110.1        | 123.0    | 122.0        |          |                 |          |
| C          | x    | 159.4        | 166.6    | 167.1        |          |                 |          |
| C          | x    | 101.9        | 100.5    | 100.0        |          |                 |          |
| C          | x    | 156.5        | 162.5    | 162.0        |          |                 |          |
| C          | x    | 107.3        | 115.4    | 114.6        |          |                 |          |
| C          |      | 18.8         | 22.1     | 20.3         |          |                 |          |
| C          |      | 20           | 19.57    | 20.25        |          |                 |          |
| C          |      | 10.3         | 12.07    | 12.73        |          |                 |          |
| C          |      | 176          | 177.51   | 177.48       |          |                 |          |
| C          | x    | 150.1        | 156.65   | 154.52       |          |                 |          |
| C          | x    | 143.2        | 144.47   | 140.94       |          |                 |          |
| C          | x    | 167.5        | 163.56   | 166.36       |          |                 |          |
| C          | x    | 109          | 115.78   | 118.55       |          |                 |          |
| C          | x    | 174.7        | 168.95   | 176.16       |          |                 |          |
| C          |      | 59.9         | 66.93    | 61.89        |          |                 |          |
| H          |      | 5.88         | 6.26     | 5.99         |          |                 |          |
| H          |      | 3.93         | 4.28     | 3.97         |          |                 |          |
| H          |      | 2.63         | 2.88     | 2.84         |          |                 |          |
| H          |      | 1.13         | 1.09     | 1.30         |          |                 |          |
| H          |      | 1.26         | 1.50     | 1.23         |          |                 |          |
| H          |      | 1.97         | 2.20     | 2.00         |          |                 |          |
| H          | x    | 6.26         | 6.17     | 6            |          |                 |          |
| H          |      | 4.12         | 4.67     | 4.58         |          |                 |          |

  

| A                | B | C        | D        | E            | F        | G               | H        |
|------------------|---|----------|----------|--------------|----------|-----------------|----------|
| Functional       |   | Solvent? |          | Basis Set    |          | Type of Data    |          |
| mPW1PW91         |   | PCM      |          | 6-311G(d, p) |          | Unscaled Shifts |          |
|                  |   | Isomer 1 | Isomer 2 | Isomer 3     | Isomer 4 | Isomer 5        | Isomer 6 |
| sDP4+ (H data)   |   | 52.38%   | 47.62%   | –            | –        | –               | –        |
| sDP4+ (C data)   |   | 2.77%    | 97.23%   | –            | –        | –               | –        |
| sDP4+ (all data) |   | 3.04%    | 96.96%   | –            | –        | –               | –        |
| uDP4+ (H data)   |   | 0.69%    | 99.31%   | –            | –        | –               | –        |
| uDP4+ (C data)   |   | 47.35%   | 52.65%   | –            | –        | –               | –        |
| uDP4+ (all data) |   | 0.62%    | 99.38%   | –            | –        | –               | –        |
| DP4+ (H data)    |   | 0.75%    | 99.25%   | –            | –        | –               | –        |
| DP4+ (C data)    |   | 2.50%    | 97.50%   | –            | –        | –               | –        |
| DP4+ (all data)  |   | 0.02%    | 99.98%   | –            | –        | –               | –        |
